# State-level tracking of COVID-19 in the United States

H. Juliette T. Unwin<sup>1,\*</sup>, Swapnil Mishra<sup>1,\*</sup>, Valerie C. Bradley<sup>2,\*</sup>, Axel Gandy<sup>3,\*</sup>, Thomas A. Mellan<sup>1</sup>, Helen Coupland<sup>1</sup>, Jonathan Ish-Horowicz<sup>3</sup>, Michaela A. C. Vollmer<sup>1</sup>, Charles Whittaker<sup>1</sup>, Sarah L. Filippi<sup>3</sup>, Xiaoyue Xi<sup>3</sup>, Mélodie Monod<sup>3</sup>, Oliver Ratmann<sup>3</sup>, Michael Hutchinson<sup>2</sup>, Fabian Valka, Harrison Zhu<sup>3</sup>, Iwona Hawryluk<sup>1</sup>, Philip Milton<sup>1</sup>, Kylie E. C. Ainslie<sup>1</sup>, Marc Baguelin<sup>1,4</sup>, Adhiratha Boonyasiri<sup>5</sup>, Nick F. Brazeau<sup>1</sup>, Lorenzo Cattarino<sup>1</sup>, Zulma Cucunuba<sup>1</sup>, Gina Cuomo-Dannenburg<sup>1</sup>, Ilaria Dorigatti<sup>1</sup>, Oliver D. Eales<sup>1</sup>, Jeffrey W. Eaton<sup>6</sup>, Sabine L. van Elsland<sup>1</sup>, Richard G. FitzJohn<sup>1</sup>, Katy A. M. Gaythorpe<sup>1</sup>, William Green<sup>1</sup>, Wes Hinsley<sup>1</sup>, Benjamin Jeffrey<sup>1</sup>, Edward Knock<sup>1</sup>, Daniel J. Laydon<sup>1</sup>, John Lees<sup>1</sup>, Gemma Nedjati-Gilani<sup>1</sup>, Pierre Nouvellet<sup>1,7</sup>, Lucy Okell<sup>1</sup>, Kris V. Parag<sup>1</sup>, Igor Siveroni<sup>1</sup>, Hayley A. Thompson<sup>1</sup>, Patrick Walker<sup>1</sup>, Caroline E. Walters<sup>1</sup>, Oliver J. Watson<sup>8,1</sup>, Lilith K. Whittles<sup>1</sup>, Azra C. Ghani<sup>1</sup>, Neil M. Ferguson<sup>1</sup>, Steven Riley<sup>1</sup>, Christl A. Donnelly<sup>1,2</sup>, Samir Bhatt<sup>1,\*</sup>, and Seth Flaxman<sup>3,\*</sup>†

<sup>1</sup>MRC Centre for Global Infectious Disease Analysis, Abdul Latif Jameel Institute for Disease and Emergency Analytics (J-IDEA), Imperial College, London, UK

<sup>2</sup>Department of Statistics, University of Oxford, Oxford, UK

<sup>3</sup>Department of Mathematics, Imperial College, London, UK

<sup>4</sup>Department of Infectious Disease Epidemiology, London School of Hygiene and Tropical Medicine, UK

<sup>5</sup>NIHR Health Protection Research Unit in Healthcare Associated Infections and Antimicrobial Resistance, Imperial College London, UK

<sup>6</sup>MRC Centre for Global Infectious Disease Analysis, Imperial College, London, UK

<sup>7</sup>School of Life Sciences, University of Sussex, Brighton, UK

<sup>8</sup>Department of Laboratory Medicine and Pathology, Brown University, Providence, RI, USA

\* Contributed equally

† Corresponding author: [s.flaxman@imperial.ac.uk](mailto:s.flaxman@imperial.ac.uk)

## Abstract

As of 1st June 2020, the US Centers for Disease Control and Prevention reported 104,232 confirmed or probable COVID-19-related deaths in the US. This was more than twice the number of deaths reported in the next most severely impacted country. We jointly modelled the US epidemic at the state-level, using publicly available death data within a Bayesian hierarchical semi-mechanistic framework. For each state, we estimate the number of individuals that have been infected, the number of individuals that are currently infectious and the time-varying reproduction number (the average number of secondary infections caused by an infected person). We used changes in mobility to capture the impact that non-pharmaceutical interventions and other behaviour changes have on the rate of transmission of SARS-CoV-2. Nationally, we estimated 3.7% [3.4%-4.0%] of the population had been infected by 1st June 2020, with wide variation between states, and approximately 0.01% of the population was infectious. We also demonstrated that good model forecasts of deaths for the next 3 weeks with low error and good coverage of our credible intervals.

**NOTE: This preprint reports new research that has not been certified by peer review and should not be used to guide clinical practice.**

# 1 Introduction

The first death caused by COVID-19 in the United States is currently believed to have occurred in Santa Clara County, California on the 6th February [1]. Throughout March 2020, US state governments implemented a variety of non-pharmaceutical interventions (NPIs), such as school closures and stay-at-home orders, to limit the spread of SARS-CoV-2 and ensure the number of severe COVID-19 cases did not exceed the capacity of the health system. In April 2020, the number of deaths attributed to COVID-19 in the United States (US) surpassed that of Italy [2]. Courtemanche *et al.* [3] used an event-study model to determine that such NPIs were successful in reducing the growth rate of COVID-19 cases across US counties. We similarly seek to estimate the impact of NPIs on COVID-19 transmission, but through a semi-mechanistic Bayesian model that reflects the underlying process of disease transmission and relies on mobility data released by companies such as Google [4].

Mobility measures reveal stark changes in behaviour following large-scale government interventions, with individuals spending more time at home and correspondingly less time at work, at leisure centres, shopping, and on public transit. Some state governments, like the Colorado Department of Public Health, have already begun to use similar mobility data to adjust guidelines over social distancing [5]. As states ease the stringency of their NPIs, future policy decisions will rely on the interaction between mobility and NPIs and their subsequent impact on transmission, alongside other measures to track and curtail SARS-CoV-2 transmission

We introduced a new Bayesian statistical framework for estimating the rate of transmission and attack rates for COVID-19 in Flaxman *et al.* [6]. There we inferred the time-varying reproduction number,  $R_t$ , which measures transmission intensity. We calculated the number of new infections through combining previous infections with the generation interval (the distribution of times between infections). The number of deaths is a function of the number of infections and the infection fatality rate (IFR). We estimated the posterior probability of our parameters given the observed data, while incorporating prior uncertainty. This makes our approach empirically driven, while incorporating as many sources of uncertainty as possible. This approach has also been implemented for Italy [7] and Brazil [8].

In this paper, we extend the Flaxman *et al.* [6] framework to model transmission in the US at the state level and include reported cases in our model. We parameterise  $R_t$  as a function of several mobility types and include an autoregressive term to capture changes in transmission that are decoupled from mobility, for example hand-washing, social distancing and changes in transmission which are decoupled from mobility. We utilise partial pooling of parameters, where information is shared across all states to leverage as much signal as possible, but individual effects are also included for state and region-specific idiosyncrasies. In this paper, we infer plausible upper and lower bounds (Bayesian credible interval summaries of our posterior distribution) of the total population that had been infected by COVID-19 on 01 June 2020 (also called the cumulative attack rate or attack rate) and estimate the effective number of individuals currently infectious given our generation distribution. We also present effect sizes of the mobility covariates and make short term forecasts, which we compare with reality throughout June. Details of the data sources and a technical description of our model are found in Sections 4 and 5 respectively. General limitations of our approach are presented in the conclusions.

## 2 Results

### 2.1 Infections

The average percentage of people that have been infected by COVID-19 on 01 June 2020 was 3.7% [3.4%-4.0%]. However, this low national average masks a stark heterogeneity across states (Table 1). New York and New Jersey had the highest estimated attack rates, of 15.9% [12.4%-19.9%] and 14.8% [11.2%-18.2%] respectively, and Connecticut and Massachusetts both had attack rates over 10%. Conversely, other states that have drawn attention for early outbreaks, such as California, Washington, and Florida, had attack rates of around 2%, and other states where the epidemic was still early, like Maine, had estimated attack rates of less than 1%.

Figure 1 shows the effective number of infectious individuals and the number of newly infected individuals on any given day up until 01 June 2020 for each of the 8 regions in our model. The effective number of infectious individuals is calculated using the generation time distribution, where individuals are weighted by how infectious they are over time, see Section 5.2 for more information. The fully infectious average includes asymptomatic and symptomatic individuals. On 01 June 2020, we estimate that there are 41,100 [34,500-46,800] infectious individuals across the US, which corresponds to 0.01% of the population. Despite new infections being in a steep decline, the number of people still infectious, and therefore able to sustain onward transmission, can still be large. Table 1 shows estimates for the number of new infections across each states on 01 June 2020. By 1 June, the estimated number infections are beginning to increase in the Mountain and TOLA regions.

Our model includes a state-level parameter for the infection ascertainment ratio,  $iar$ , which we define as the number of reported cases divided by the true number of infections (including asymptomatic infections). We only estimate this parameter from 11 May 2020 when more than 375,000 tests are done each day, see Appendix A for further information. The infection ascertainment ratio varies significantly between states. Column 3 of Table 1 shows the value of the infection ascertainment ratio in our model (see Section 5). We would not expect infection ascertainment to be 100% because our model includes asymptomatic individuals who may not know they have COVID-19. The mean value of this ratio varies between 43% (Missouri) to 74% (Kansas and Tennessee), which suggests that states are doing very different levels of testing.

### 2.2 Reproduction number

The mean estimate for  $R_t$  was below one in 23 states<sup>1</sup> on 01 June 2020 and the 95% credible intervals did not exclude one in any state (see Appendix B for  $R_t$ s by state). Figure 2 depicts the geographical variation in the posterior probability that  $R_t$  is less than 1. The closer a value is to 100%, the more certain we are that the rate of transmission is below 1, indicating that new infections are not increasing. The probability is less than 40% that  $R_t < 1$  in 20 states. There is substantial geographical clustering; most states in the Midwest and the South have rates of transmission that suggest the epidemic is not under control. We include plots of  $R_t$ , infections and deaths over time for each state in Appendix C.

---

<sup>1</sup>45.10% of states

Table 1: Posterior model estimates of percentage of total population ever infected, mean new infections per day over week ending 01 June 2020, and infection ascertainment ratio as of 01 June 2020. We present the mean and the 95% credible intervals in square brackets.

| State                | % of total population infected | Estimated mean new infections per day over week ending 01 June 2020 | Infection ascertainment ratio |
|----------------------|--------------------------------|---------------------------------------------------------------------|-------------------------------|
| Alabama              | 1.8% [1.4%-2.3%]               | 1,065 [300-2,400]                                                   | 59% [35%-80%]                 |
| Alaska               | 0.1% [0.0%-0.2%]               | 20 [0-100]                                                          | 69% [46%-88%]                 |
| Arizona              | 1.6% [1.2%-2.0%]               | 1,003 [400-1,800]                                                   | 55% [35%-81%]                 |
| Arkansas             | 0.7% [0.5%-1.0%]               | 451 [100-900]                                                       | 66% [45%-86%]                 |
| California           | 1.5% [1.1%-1.9%]               | 4,863 [2,100-10,600]                                                | 59% [37%-80%]                 |
| Colorado             | 3.2% [2.6%-4.1%]               | 674 [200-1,400]                                                     | 54% [33%-79%]                 |
| Connecticut          | 11.4% [9.1%-14.5%]             | 520 [200-1,200]                                                     | 53% [32%-78%]                 |
| Delaware             | 4.4% [3.4%-5.6%]               | 153 [0-300]                                                         | 68% [45%-87%]                 |
| District of Columbia | 9.7% [7.6%-12.3%]              | 134 [0-300]                                                         | 60% [39%-83%]                 |
| Florida              | 1.2% [0.9%-1.5%]               | 1,350 [600-2,700]                                                   | 61% [39%-83%]                 |
| Georgia              | 2.7% [2.1%-3.4%]               | 1,528 [600-3,600]                                                   | 46% [25%-70%]                 |
| Hawaii               | 0.1% [0.0%-0.3%]               | 2 [0-100]                                                           | 69% [49%-89%]                 |
| Idaho                | 0.6% [0.4%-0.9%]               | 47 [0-100]                                                          | 70% [48%-88%]                 |
| Illinois             | 5.2% [4.1%-6.5%]               | 2,198 [800-4,500]                                                   | 63% [40%-84%]                 |
| Indiana              | 3.8% [3.1%-4.9%]               | 779 [300-1,700]                                                     | 61% [36%-82%]                 |
| Iowa                 | 2.3% [1.7%-2.8%]               | 542 [200-1,100]                                                     | 58% [36%-81%]                 |
| Kansas               | 1.1% [0.8%-1.4%]               | 189 [0-400]                                                         | 74% [58%-91%]                 |
| Kentucky             | 1.2% [0.9%-1.6%]               | 359 [100-800]                                                       | 58% [36%-81%]                 |
| Louisiana            | 7.1% [5.7%-9.0%]               | 660 [300-1,400]                                                     | 63% [38%-86%]                 |
| Maine                | 0.7% [0.5%-1.0%]               | 78 [0-200]                                                          | 64% [42%-85%]                 |
| Maryland             | 5.5% [4.3%-6.7%]               | 1,675 [600-3,200]                                                   | 60% [38%-83%]                 |
| Massachusetts        | 11.2% [9.0%-14.0%]             | 3,387 [1,300-7,000]                                                 | 43% [23%-68%]                 |
| Michigan             | 5.8% [4.5%-7.2%]               | 641 [200-1,500]                                                     | 54% [30%-76%]                 |
| Minnesota            | 2.6% [1.9%-3.2%]               | 1,110 [400-2,400]                                                   | 57% [36%-80%]                 |
| Mississippi          | 3.1% [2.5%-4.1%]               | 687 [300-1,600]                                                     | 48% [27%-73%]                 |
| Missouri             | 1.5% [1.1%-1.9%]               | 504 [200-1,100]                                                     | 43% [24%-69%]                 |
| Montana              | 0.2% [0.0%-0.3%]               | 11 [0-100]                                                          | 71% [47%-87%]                 |
| Nebraska             | 1.5% [1.2%-2.0%]               | 379 [100-900]                                                       | 73% [53%-90%]                 |
| Nevada               | 1.8% [1.4%-2.3%]               | 197 [0-400]                                                         | 62% [40%-84%]                 |
| New Hampshire        | 2.0% [1.5%-2.6%]               | 152 [0-400]                                                         | 54% [30%-78%]                 |
| New Jersey           | 14.8% [11.2%-18.2%]            | 1,493 [500-3,200]                                                   | 52% [31%-79%]                 |
| New Mexico           | 2.0% [1.6%-2.6%]               | 176 [0-400]                                                         | 61% [36%-81%]                 |
| New York             | 15.9% [12.4%-19.9%]            | 2,056 [800-4,200]                                                   | 59% [37%-81%]                 |
| North Carolina       | 1.3% [1.0%-1.7%]               | 1,859 [800-4,100]                                                   | 56% [34%-78%]                 |
| North Dakota         | 1.2% [0.8%-1.7%]               | 49 [0-200]                                                          | 71% [47%-88%]                 |
| Ohio                 | 2.1% [1.7%-2.7%]               | 1,141 [400-2,700]                                                   | 48% [28%-75%]                 |
| Oklahoma             | 1.1% [0.8%-1.4%]               | 117 [0-300]                                                         | 66% [43%-85%]                 |
| Oregon               | 0.4% [0.3%-0.6%]               | 85 [0-200]                                                          | 72% [50%-89%]                 |
| Pennsylvania         | 4.4% [3.4%-5.5%]               | 1,310 [400-2,600]                                                   | 51% [28%-78%]                 |
| Rhode Island         | 7.5% [5.8%-9.4%]               | 246 [0-700]                                                         | 51% [27%-74%]                 |
| South Carolina       | 1.3% [0.9%-1.8%]               | 743 [200-1,400]                                                     | 51% [30%-78%]                 |
| South Dakota         | 1.1% [0.7%-1.5%]               | 110 [0-300]                                                         | 69% [48%-87%]                 |
| Tennessee            | 0.8% [0.6%-1.1%]               | 406 [100-800]                                                       | 74% [54%-90%]                 |
| Texas                | 0.9% [0.7%-1.2%]               | 2,208 [1,000-4,400]                                                 | 65% [44%-86%]                 |
| Utah                 | 0.8% [0.6%-1.1%]               | 420 [100-800]                                                       | 66% [45%-86%]                 |
| Vermont              | 0.9% [0.5%-1.3%]               | 6 [0-100]                                                           | 69% [46%-87%]                 |
| Virginia             | 2.3% [1.8%-2.9%]               | 1,879 [800-3,900]                                                   | 62% [40%-83%]                 |
| Washington           | 1.8% [1.4%-2.3%]               | 533 [200-1,200]                                                     | 62% [38%-83%]                 |
| West Virginia        | 0.5% [0.3%-0.7%]               | 70 [0-200]                                                          | 65% [43%-86%]                 |
| Wisconsin            | 1.3% [1.0%-1.7%]               | 846 [300-1,900]                                                     | 61% [37%-80%]                 |
| Wyoming              | 0.3% [0.1%-0.6%]               | 15 [0-100]                                                          | 65% [39%-85%]                 |
| <b>National</b>      | <b>3.7% [3.4%-4.0%]</b>        | <b>41,100 [34,500-46,800]</b>                                       |                               |

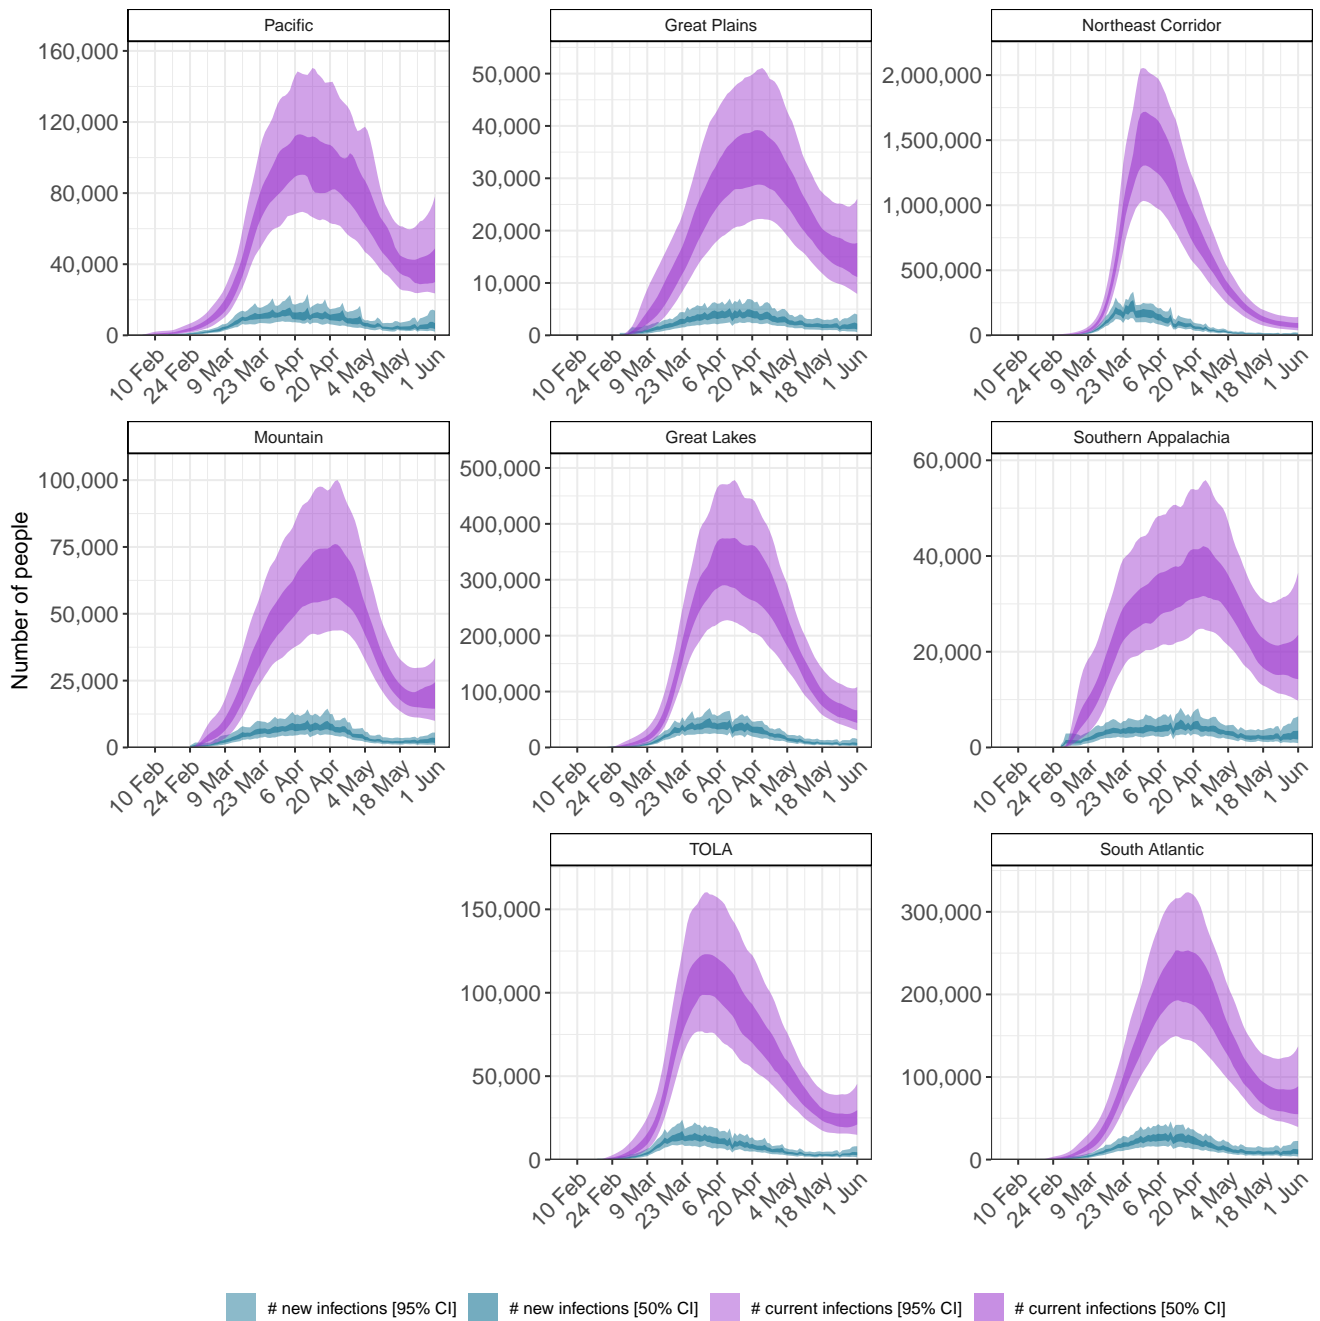

Figure 1: Estimates for the effective number of infectious individuals on a day in purple (light purple, 95% CI, dark purple 50% CI) and for newly infected people per day in blue (light blue, 95% CI, dark blue: 50% CI).

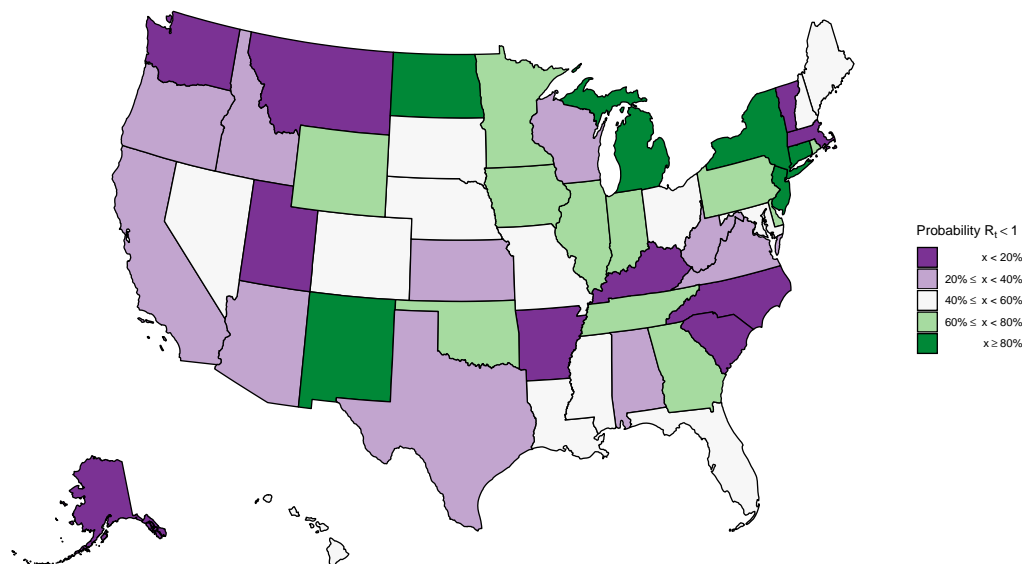

Figure 2: Our estimates of the probability that  $R_t$  is less than one (epidemic control) for each state. These values are an average over the week ending 01 June 2020.

### 2.3 Model effect sizes

We find that decreases in the overall average number of visits to different places had a significant effect on reducing transmission. If mobility stopped entirely (100% reduction in average mobility) then  $R_t$  would be reduced by 55.1% [26.5% - 77.0%]. However, in the United States, the average mobility covariate never approached a 100% reduction, and only about half the states had reductions below 50% of the baseline. As an example, consider the largest reduction observed, -62% of the baseline (Minnesota on 12 April 2020). The effect on  $R_t$  was a reduction of 37% [16% - 56%] from the country level effect.

Increased time spent in residences also reduced transmission; if time spent in residences increased to 100% of the baseline,  $R_t$  would be reduced by 15.3% [-27.5% - 54.6%]. Time spent in residences increased by 20% or more from the baseline in 36 states. As an example, consider the largest reduction observed, a 33% increase from the baseline (New Jersey on 10 April 2020). The effect on  $R_t$  from this was a reduction of 5% [-10% - 20%] in New Jersey from the country level effect. Plots of effect size estimates for the country, regional and state-level effects are given in Appendix D.

We note that the average mobility and residential effects are likely related. When people spend less time in public spaces, captured by our average mobility metric, they conversely spend more time at home. Overall, the reduction in transmission from the number of people with whom the average individual comes into contact outweighs the potential risk of increased transmission within a single residence. We also considered using the average mobility across the whole of the US to drive our changes in transmission in each state but found this model was less able to forecast than using individual state trends.

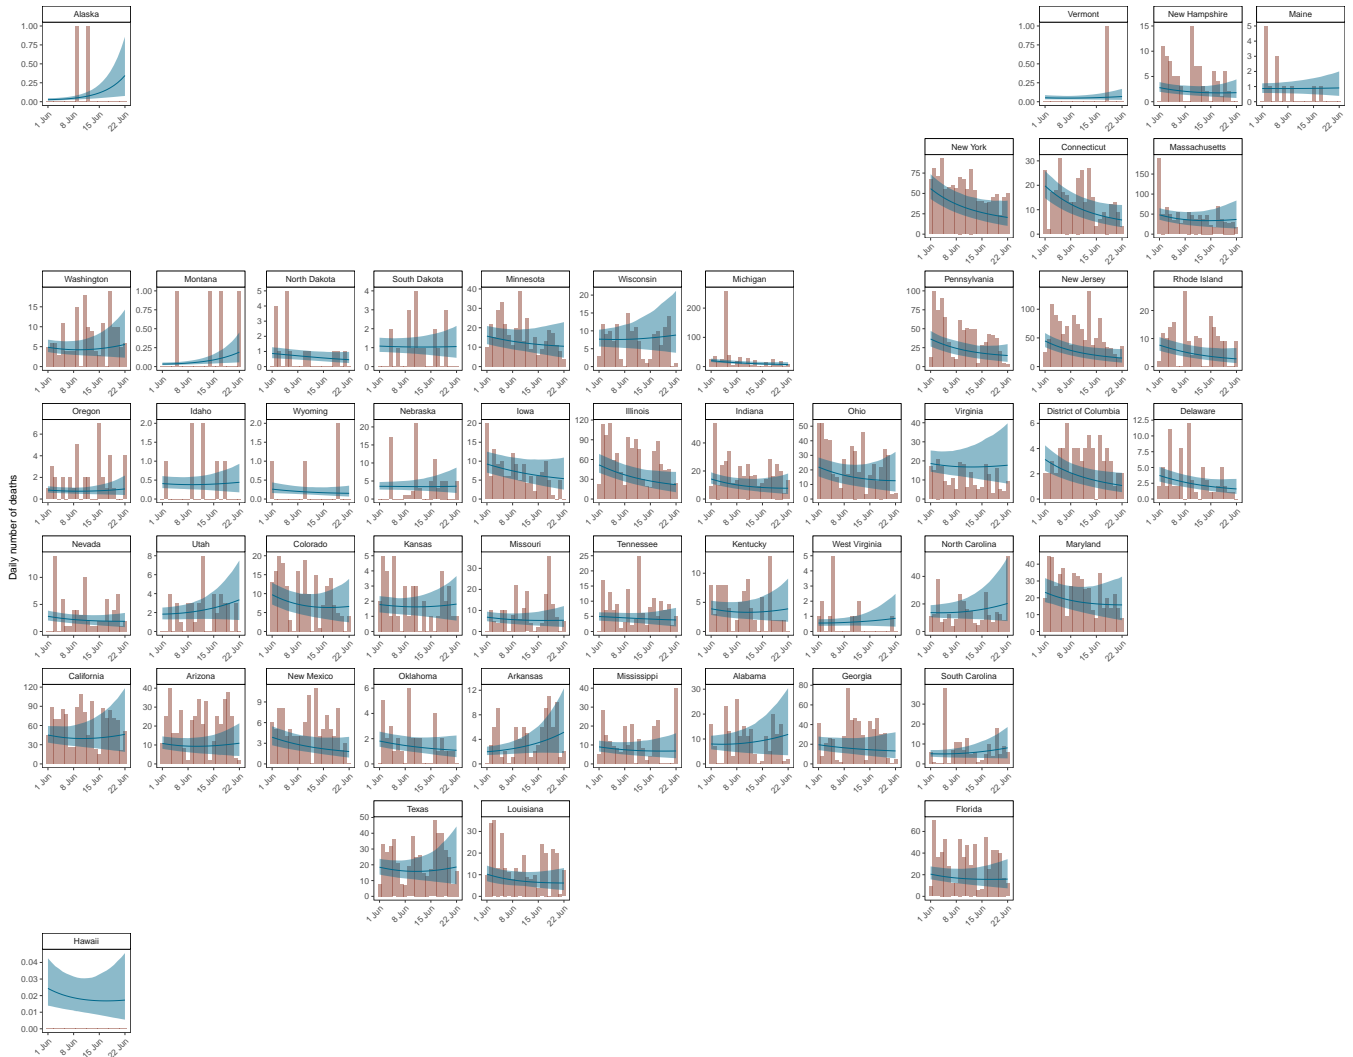

Figure 3: Three week forecasts for model fitted up until 01 June 2020. The coral bars show the reported number of deaths for the three weeks after 01 June 2020, and the blue line and ribbon show the mean and 95% CI for our forecast estimates.

## 2.4 Short term forecasts

We used our model to produce short term forecasts of the epidemic. Figure 3 compares our forecasts for the three weeks after 01 June 2020 (blue line with shaded uncertainty intervals) with the recorded daily number of deaths during this period (coral bars). As expected from our  $R_t$  values, deaths were noticeably declining in the Northeastern Corridor with particularly low error between our forecasts and reality in New York and Connecticut. In the South, we forecast a flattening or slight increase of deaths, especially in Arkansas, Texas and Florida.

We investigated the numerical accuracy of our forecast using three metrics: mean absolute error, continuous ranked probability score and coverage of credible intervals. We fitted our model to three end points: 25 May, 1 June, and 8 June 2020 and forecasting three weeks into the future from each end point. As shown in Appendix E, the results were very similar for each period. The mean absolute error for the period ending 01 June 2020 was 11.0 people across all states and the continuous ranked probability score was 7.2. The coverage probabilities of the 95% credible intervals was 93.2%.

## 2.5 Model selection and sensitivity

Mobility data provided a proxy for the behavioural changes that occur in response to non-pharmaceutical interventions. Appendix F shows the mobility trends for the 50 states and the District of Columbia up until 01 June 2020 (see Section 4 for a description of the mobility dimensions). The median correlation between the observed average mobility the timing of introduction of major NPIs (represented as step functions) was approximately 86% (see Appendix G). We make no explicit causal link between NPIs and mobility, however, this relationship is plausibly causally linked but confounded by other factors. The mobility trends data suggests that substantial early outbreak in New York state may have led to substantial changes in mobility in nearby states, like Connecticut, prior to any mandated interventions in those states. Including both mobility trends and the timing of imposition and lifting of "stay-at-home" orders did not affect the estimated attack rates (see Appendix H).

Mobility alone cannot capture all the determinants of how transmission evolves over time. In particular, it cannot capture the impact of case-based interventions (such as testing and tracing). To allow for changes in transmission decoupled from by mobility we use a second-order, weekly, autoregressive process. This autoregressive process is an additional term in our parametric equation for  $R_t$  and accounts for residual effects by capturing a correlation structure where current  $R_t$  is correlated with previous weeks  $R_t$ . The learnt random effects from this process are shown in Appendix I. Early on in states such as Washington, the flat residual variation suggests that mobility explains most of the changes in transmission. However, towards the end of May and for regions with advanced epidemics, such as New York or New Jersey, there is evidence of additional decreases in transmission beyond that predicted by mobility covariates. These may capture the impact of other control measures, such as increased testing, as well as behavioural responses not captured by mobility, like increased mask-wearing and hand-washing.

## 3 Discussion

We developed a Bayesian semi-mechanistic modelling approach to investigate the impact of NPIs on the spread of SARS-CoV-2 in the United States through changes in mobility. Our model relies on death data from the start of the epidemic and recently reported case data to inform our predictions. This enabled us to estimate a realistic infection ascertainment ratio for the three weeks before 01 June 2020 for each state, which could help inform policy as to where testing may be lacking. The mean value of this ratio varies between 43% (Missouri) to 74% (Kansas and Tennessee). Our epidemiological grounded mechanistic model links unobserved infections to reported cases and deaths, all within a principled Bayesian statistical framework. This is a significant advancement over curve-fitting models fit directly to reported cases.

Our model suggests that although initial reductions in the daily infections had plateaued in most states by 01 June 2020, the reservoir of infectious individuals still remained large with approximately 0.01% of the population being infectious on that date and posing a risk of further transmission. Despite this, the attack rate across the US still remained low. We found our attack rate for New York was in line with those from recent serological studies [9]. There is now evidence that mild infection is able to lead to robust immunity (via T cells) but potentially not induce antibody production, which are detected in serosurveys [10]. Therefore, serosurveys might underestimate exposure, particularly in mild cases, and our model may provide an alternative way to measure population exposure. Our attack rates are, however, sensitive to the assumed values of infection fatality rate (IFR). We account for each individual



state's age structure, and further adjust for contact mixing patterns [11], but age specific modelling may be necessary to capture potential changes in the demographics of cases in states such as Texas, Florida and South Carolina where there is evidence that younger people are being infected [12, 13].

We estimated that 23 states had a posterior mean reproduction number  $R_t$  above one on 01 June 2020 and in no states were we more than 95% confident that  $R_t$  was below one. These reproduction numbers suggest that the US epidemic was not under control in many states, and that the loosening of interventions seen in June, without additional measures in place, would result in increased infections. States with high reproduction numbers on 01 June 2020 were geographically clustered in the southern US and Great Plains region, while states that have suffered high COVID-19 mortality (such as the Northeast Corridor) had lower reproduction numbers. Beginning in early June, after the period covered by this study, reported cases have begun to increase in the US, and 7 states (Arizona, Arkansas, California, North Carolina, South Carolina, Tennessee and Texas) have recorded higher levels of hospitalisations than before [14, 15]. We present our up-to-date estimates of  $R_t$ , the number of infections, and the number of people currently infectious on our website<sup>2</sup>.

Our model uses mobility to predict the rate of transmission; while mobility will explain a large amount of the trend in  $R_t$ , there is likely to be substantial residual variation which will be geographically heterogeneous. We accounted for this residual variation through a second order, weekly, autoregressive process. This stochastic process captures changes in  $R(t)$  reflected in the data but is unable to attribute these changes to other determinants of transmission or interventions. We pool parameters in our model to leverage as much signal in our data as possible and to reflect the conjoined nature of some states, in particular in the Northeastern Corridor. While this sharing can potentially lead to over or under estimation of effect sizes, it also means that a consistent signal for all states can be estimated before that signal is presented in an individual state with little data, such as Alaska and Hawaii. Pooling also increases the robustness of our models to under reporting and time lags [7, 8, 6]. Our three week forecasts of daily deaths were highly accurate, confirming the predictive validity of our modelling approach, despite our having kept mobility constant during our forecasts. These forecasts, alongside our  $R_t$  values, show that the epidemic was not under control at the end of May.

## 4 Data

Our model uses daily real-time state-level aggregated data published by New York Times (NYT) [16] for New York State and John Hopkins University (JHU) [2] for the remaining states. Age specific population counts were drawn from the U.S. Census Bureau in 2018 [17] to estimate state-specific infection fatality ratio reflective of the population age structure. The timing of NPIs were collated by the University of Washington [18]. We used Google's COVID-19 Community Mobility Report [4], which provides data on movement in the USA by states and highlights the percent change in visits to:

- Grocery & pharmacy: Mobility trends for places like grocery markets, food warehouses, farmers markets, speciality food shops, drug stores, and pharmacies.
- Parks: Mobility trends for places like local parks, national parks, public beaches, marinas, dog parks, plazas, and public gardens.

---

<sup>2</sup><https://mrc-ide.github.io/covid19usa/>

- Transit stations: Mobility trends for places like public transport hubs such as subway, bus, and train stations.
- Retail & recreation: Mobility trends for places like restaurants, cafes, shopping centres, theme parks, museums, libraries, and movie theatres.
- Residential: Mobility trends for places of residence.
- Workplaces: Mobility trends for places of work.

The residential data includes length of stay at different places compared to a baseline, whereas the other mobility trends are based on number of visits to a certain place. These trends are therefore relative, i.e. mobility of -20% means that, compared to normal circumstances individuals are engaging in a given activity 20% less.

## 5 Methods

Flaxman *et al.* [6] introduced a Bayesian model for estimating the transmission intensity and attack rate (percentage of the population that has been infected) from COVID-19 from the reported number of deaths. This framework used the time-varying reproduction number  $R_t$  to inform a latent function for infections, and then these infections, together with probabilistic lags, were calibrated against observed deaths. Observed deaths, while still susceptible to under reporting and delays, comprise a more consistent time series than the reported number of confirmed cases, which are susceptible to changes in the probability of ascertainment over the course of the epidemic as testing strategies changed. Our model code is available on GitHub<sup>3</sup>.

We adapted the original Bayesian semi-mechanistic model of the infection cycle to all the states in the USA and the District of Columbia to infer the reproduction number over time ( $R_t$ ), plausible upper and lower bounds (95% Bayesian credible intervals) of the total populations infected (attack rates) and the number of people currently infected on 01 June 2020. In this paper, we also include the reported number of cases after 11 May 2020, see Appendix A. This reflects the point in time when over 375,000 tests were being done each day across the US. We include this in our likelihood but do not use them to calculate transmission directly. We parametrise  $R_t$  as a function of Google mobility data and include an autoregressive term to capture non-mobility driven behaviour. We fit our model jointly to COVID-19 data from all states to assess the attack rates and number of people who were currently infected. Finally, we use our model to forecast for 3 weeks from 01 June 2020 and compare our estimates of deaths to those recorded in the US for each state. We assume mobility remains constant at the previous value of mobility on the same day the previous week in our forecasts and the autoregressive term remains constant.

### 5.1 Model specifics

The true number of infected individuals,  $i$ , is modelled using a discrete renewal process. We specify a generation distribution  $g$  with density  $g(\tau)$  as:

$$g \sim \text{Gamma}(6.5, 0.62). \quad (1)$$

---

<sup>3</sup><https://github.com/ImperialCollegeLondon/covid19model>

Given the generation distribution, the number of infections  $i_{t,m}$  on a given day  $t$ , and state  $m$ , is given by the following discrete convolution function:

$$i_{t,m} = S_{t,m} R_{t,m} \sum_{\tau=0}^{t-1} i_{\tau,m} g_{t-\tau}, \quad (2)$$

$$S_{t,m} = 1 - \frac{\sum_{j=0}^{t-1} i_{j,m}}{N_m},$$

where the generation distribution is discretised by  $g_s = \int_{s-0.5}^{s+0.5} g(\tau) d\tau$  for  $s = 2, 3, \dots$ , and  $g_1 = \int_0^{1.5} g(\tau) d\tau$ . The population of state  $m$  is denoted by  $N_m$ . We include the adjustment factor  $S_{t,m}$  to account for the number of susceptible individuals left in the population.

Both deaths and cases are observed in our model. We define daily deaths,  $D_{t,m}$ , for days  $t \in \{1, \dots, n\}$  and states  $m \in \{1, \dots, M\}$ . These daily deaths are modelled using a positive real-valued function  $d_{t,m} = \mathbb{E}[D_{t,m}]$  that represents the expected number of deaths attributed to COVID-19. The daily deaths  $D_{t,m}$  are assumed to follow a negative binomial distribution with mean  $d_{t,m}$  and variance  $d_{t,m} + \frac{d_{t,m}^2}{\psi_1}$ , where  $\psi_1$  follows a positive half normal distribution, i.e.

$$D_{t,m} \sim \text{Negative Binomial} \left( d_{t,m}, d_{t,m} + \frac{d_{t,m}^2}{\psi_1} \right), \quad t = 1, \dots, n \quad (3)$$

$$\psi_1 \sim \mathcal{N}^+(0, 5). \quad (4)$$

Here,  $\mathcal{N}(\mu, \sigma)$  denotes a normal distribution with mean  $\mu$  and standard deviation  $\sigma$ . We say that  $X$  follows a positive half normal distribution  $\mathcal{N}^+(0, \sigma)$  if  $X \sim |Y|$ , where  $Y \sim \mathcal{N}(0, \sigma)$ .

We link our observed deaths mechanistically to transmission as in Flaxman et al. [6]. We use a previously estimated COVID-19 infection fatality ratio (IFR, probability of death given infection) together with a distribution of times from infection to death  $\pi$ . Details of this calculation can be found in [19, 20]. From the above, every region has a specific mean infection fatality ratio  $\text{ifr}_m$  (see Appendix J). To incorporate the uncertainty inherent in this estimate we allow the  $\text{ifr}_m$  for every state to have additional noise around the mean. Specifically we assume

$$\text{ifr}_m^* \sim \text{ifr}_m \cdot \mathcal{N}(1, 0.1). \quad (5)$$

We believe a large-scale contact survey similar to polymod [11] has not been collated for the USA, so we assume the contact patterns are similar to those in the UK. We conducted a sensitivity analysis, shown in Appendix J, and found that the IFR calculated using the contact matrices of other European countries lay within the posterior of  $\text{ifr}_m^*$ .

Using estimated epidemiological information from previous studies, we assume the distribution of times from infection to death  $\pi$  (infection-to-death) to be the convolution of an infection-to-onset distribution ( $\pi'$ ) [20] and an onset-to-death distribution [19]:

$$\pi \sim \text{Gamma}(5.1, 0.86) + \text{Gamma}(17.8, 0.45). \quad (6)$$

The expected number of deaths  $d_{t,m}$ , on a given day  $t$ , for state  $m$  is given by the following discrete sum:

$$d_{t,m} = \text{ifr}_m^* \sum_{\tau=0}^{t-1} i_{\tau,m} \pi_{t-\tau}, \quad (7)$$

where  $i_{\tau,m}$  is the number of new infections on day  $\tau$  in state  $m$  and where, similar to the generation distribution,  $\pi$  is discretized via  $\pi_s = \int_{s-0.5}^{s+0.5} \pi(\tau) d\tau$  for  $s = 2, 3, \dots$ , and  $\pi_1 = \int_0^{1.5} \pi(\tau) d\tau$ , where  $\pi(\tau)$  is the density of  $\pi$ .

For every state  $m$ , we also observe daily cases  $C_{t,m}$  after  $t_c = 11$  May 2020. Similar to daily deaths, daily cases are modelled using a positive real-valued function  $\bar{c}_{t,m} = \mathbb{E}[C_{t,m}]$  that represents the expected number of symptomatic and asymptomatic cases. Again, the daily cases  $C_{t,m}$  are assumed to follow a negative binomial distribution but with mean  $c_{t,m}$  and variance  $c_{t,m} + \frac{c_{t,m}^2}{\psi_2}$ , where  $\psi_2$  follows a positive half normal distribution, i.e.

$$C_{t,m} \sim \text{Negative Binomial} \left( c_{t,m}, c_{t,m} + \frac{c_{t,m}^2}{\psi_2} \right), \quad t = t_c, \dots, n, \quad (8)$$

$$\psi_2 \sim \mathcal{N}^+(0, 5). \quad (9)$$

As before, we assume the distribution of times from infection to becoming a case  $\pi'$  (infection-to-onset) to be

$$\pi' \sim \text{Gamma}(5.1, 0.86). \quad (10)$$

We add in a new link between our observed daily cases and our estimated daily infections. We use our model to estimate an infection ascertainment ratio ( $\text{iar}_m$ ) for each state  $m$ , which is defined as the number of reported cases divided by the true number of infections (including both symptomatic and asymptomatic infections). This follows a Beta distribution, specifically  $u_m \sim \text{Beta}(12, 5)$ .

The expected number of cases  $c_{t,m}$ , on a given day  $t$ , for state  $m$  is given by the following discrete sum:

$$c_{t,m} = \text{iar}_m \sum_{\tau=0}^{t-1} i_{\tau,m} \pi'_{t-\tau}, \quad (11)$$

where, again,  $c_{\tau,m}$  is the number of new infections on day  $\tau$  in state  $m$  and where  $\pi'$  is discretized via  $\pi'_s = \int_{s-0.5}^{s+0.5} \pi'(\tau) d\tau$  for  $s = 2, 3, \dots$ , and  $\pi'_1 = \int_0^{1.5} \pi'(\tau) d\tau$ , where  $\pi'(\tau)$  is the density of  $\pi'$ .

We parametrise  $R_{t,m}$  as a linear function of the relative change in time spent and number of visits (from a baseline)

$$R_{t,m} = R_{0,m} \cdot f \left( - \left( \sum_{k=1}^2 X_{t,m,k} \alpha_k \right) - \sum_{l=1}^2 Y_{t,m,l} \alpha_{r(m),l}^{\text{region}} - Z_{t,m} \alpha_m^{\text{state}} - \epsilon_{m,w_m(t)} \right), \quad (12)$$

where  $f(x) = 2 \exp(x)/(1 + \exp(x))$  is twice the inverse logit function.  $X_{t,m,k}$  are covariates that have the same effect for all states,  $Y_{t,m,l}$  is a covariate that has region-specific effects,  $r(m) \in \{1, \dots, R\}$  is the region a state is in (see Figure 12),  $Z_{t,m}$  is a covariate that has a state-specific effect and  $\epsilon_{m,w_m(t)}$  is a weekly AR(2) process, centred around 0, that captures variation between states that is not explained by the covariates.

The prior distribution for  $R_{0,m}$  [21] was chosen to be

$$R_{0,m} \sim \mathcal{N}(3.28, \kappa) \text{ with } \kappa \sim \mathcal{N}^+(0, 0.5), \quad (13)$$

where  $\kappa$  is the same among all states.

In the analysis of this paper we chose the following covariates:  $X_{t,m,1} = M_{t,m}^{\text{average}}$ ,  $X_{t,m,2} = M_{t,m}^{\text{residential}}$ ,  $Y_{t,m,1} = 1$  (an intercept),  $Y_{t,m,2} = M_{t,m}^{\text{average}}$  and  $Z_{t,m} = M_{t,m}^{\text{average}}$ , where the mobility variables are from [4] and defined as follows (all are encoded so that 0 is the baseline and 1 is a full reduction of the mobility in this dimension):

- $M_{t,m}^{\text{average}}$  is an average of retail and recreation, groceries and pharmacies, and workplaces. An average is taken as these dimensions are strongly collinear.

- $M_{t,m}^{\text{residential}}$  are the mobility trends for places of residences.

We assume that seeding of new infections begins 30 days before the day after a state has cumulatively observed 10 deaths. From this date, we seed our model with 6 sequential days of an equal number of infections:  $i_{1,m} = \dots = i_{6,m} \sim \text{Exponential}(\frac{1}{\tau})$ , where  $\tau \sim \text{Exponential}(0.03)$ . These seed infections are inferred in our Bayesian posterior distribution.

The weekly, state-specific effect is modelled as a weekly AR(2) process, centred around 0 with stationary standard deviation  $\sigma_w$  that, in every state, starts on the first day of its seeding of infections, i.e. 30 days before a total of 10 cumulative deaths have been observed in this state. The AR(2) process starts with  $\epsilon_{1,m} \sim \mathcal{N}(0, \sigma_w^*)$ ,

$$\epsilon_{w,m} \sim \mathcal{N}(\rho_1 \epsilon_{w-1,m} + \rho_2 \epsilon_{w-2,m}, \sigma_w^*) \text{ for } m = 2, 3, 4, \dots \quad (14)$$

with independent priors on  $\rho_1$  and  $\rho_2$  that are normal distributions conditioned to be in  $[0, 1]$ ; the prior for  $\rho_1$  is a  $\mathcal{N}(0.8, .05)$  distribution conditioned to be in  $[0, 1]$  and the prior for  $\rho_2$  is a  $\mathcal{N}(0.1, .05)$  distribution, conditioned to be in  $[0, 1]$ . The prior for  $\sigma_w$ , the standard deviation of the stationary distribution of  $\epsilon_w$  is chosen as  $\sigma_w \sim \mathcal{N}^+(0, .2)$ . The standard deviation of the weekly updates to achieve this standard deviation of the stationary distribution is  $\sigma_w^* = \sigma_w \sqrt{1 - \rho_1^2 - \rho_2^2 - 2\rho_1^2\rho_2/(1 - \rho_2)}$ . The conversion from days to weeks is encoded in  $w_m(t)$ . Every 7 days,  $w_m$  is incremented, i.e. we set  $w_m(t) = \lfloor (t - t_m^{\text{start}})/7 \rfloor + 1$ , where  $t_m^{\text{start}}$  is the first day of seeding. We keep the AR(2) process constant over the last 7 days of observations since this is less informed by data due to the lags and also over the forecast period.

The prior distribution for the shared coefficients were chosen to be

$$\alpha_k \sim \mathcal{N}(0, 0.5), k = 1, \dots, 3, \quad (15)$$

and the prior distribution for the pooled coefficients were chosen to be

$$\alpha_{r,l}^{\text{region}} \sim \mathcal{N}(0, \gamma_r), r = 1, \dots, R, l = 1, 2, \text{ with } \gamma_r \sim \mathcal{N}^+(0, 0.5), \quad (16)$$

$$\alpha_m^{\text{state}} \sim \mathcal{N}(0, \gamma_s), m = 1, \dots, M \text{ with } \gamma_s \sim \mathcal{N}^+(0, 0.5). \quad (17)$$

We estimated parameters jointly for all states in a single hierarchical model. Fitting was done in the probabilistic programming language Stan[22] using an adaptive Hamiltonian Monte Carlo (HMC) sampler.

## 5.2 Generated quantities

The effective number of infectious individuals,  $i^*$ , on a given day considers how infectious a previously infected individual is on a given day and includes both asymptomatic and symptomatic individuals. It is calculated by first re-scaling the generation distribution by its maximum, i.e.  $g_\tau^* = \frac{g_\tau}{\max_t g_t}$ . Based on (2), the number of infectious individuals is then calculated from the number of previously infected individuals,  $c$ , using the following:

$$i_{t,m}^* = \sum_{\tau=0}^{t-1} i_{\tau,m} g_{t-\tau}^*, \quad (18)$$

where  $i_{t,m}$  is the number of new infections on day  $t$  in state  $m$ .

## 6 Acknowledgements

We would like to thank Amazon AWS and Microsoft Azure for computational credits and we would like to thank the Stan development team for their ongoing assistance. We would also like to thank David Joerg and Jacob Steinhardt for their comments through Open Review. This work was supported by Centre funding from the UK Medical Research Council under a concordat with the UK Department for International Development, the NIHR Health Protection Research Unit in Modelling Methodology and Community Jameel. HJTU is funded by Imperial College London through an Imperial College Research Fellowship grant.

## 7 Author Contributions

HJTU, SM, VB, AG, SB and SF conceived and designed the study. HJTU, SM, TM, MACV, HZ and PM performed mobility analysis. JI-H, SLF and XX contributed to statistical analysis and MH and IH did other analysis. HJTU, SM, AG, TM, HC, MACV, VW, MM, OR, SB and SF contributed to code development. HJTU, MACV and SF did the plotting. SM and FV created the website. HJTU, VB, SB and SF wrote the first draft of the paper. All authors discussed the results and contributed to the revision of the final manuscript.

## 8 Data and Code availability

All source code and data necessary for the replication of our results and figures is available at <https://github.com/ImperialCollegeLondon/covid19model>.

## 9 Competing Interests statement

The authors declare no competing interests.

## References

1. Santa Clara County Public Health. *County of Santa Clara Identifies Three Additional Early COVID-19 Deaths* 2020. <https://www.sccgov.org/sites/covid19/Pages/press-release-04-21-20-early.aspx>.
2. Dong, E, Du, H & Gardner, L. An interactive web-based dashboard to track COVID-19 in real time. *eng. The Lancet. Infectious diseases*, 1473–3099. ISSN: 1474-4457. <https://pubmed.ncbi.nlm.nih.gov/32087114https://www.ncbi.nlm.nih.gov/pmc/articles/PMC7159018/> (Feb. 2020).
3. Courtemanche, C, Garuccio, J, Le, A, Pinkston, J & Yelowitz, A. Strong Social Distancing Measures In The United States Reduced The COVID-19 Growth Rate. *Health Affairs* **39** (2020).
4. Aktay, A *et al.* *Google COVID-19 Community Mobility Reports: Anonymization Process Description (version 1.0)* 2020.

5. Bayham, J, Adams, J, Ghosh, D, Jackson, P & the Colorado COVID-19 Modeling Group. *Colorado Mobility Patterns During the COVID-19 Response* 2020. [http://www.ucdenver.edu/academics/colleges/PublicHealth/coronavirus/Documents/Mobility%20Report\\_final.pdf](http://www.ucdenver.edu/academics/colleges/PublicHealth/coronavirus/Documents/Mobility%20Report_final.pdf).
6. Flaxman, S *et al.* Estimating the effects of non-pharmaceutical interventions on COVID-19 in Europe. *Nature* (2020).
7. Vollmer, M *et al.* *Report 20: Using mobility to estimate the transmission intensity of COVID-19 in Italy: A subnational analysis with future scenarios* 2020.
8. Mellan, T. A. *et al.* *Report 21 - Estimating COVID-19 cases and reproduction number in Brazil* 2020.
9. Kissler, S. M. *et al.* *Reductions in commuting mobility predict geographic differences in SARS-CoV-2 prevalence in New York City* 2020. <http://nrs.harvard.edu/urn-3:HUL.InstRepos:42665370>.
10. Long, Q.-X. *et al.* Clinical and immunological assessment of asymptomatic SARS-CoV-2 infections. *Nature Medicine* (2020).
11. Mossong, J *et al.* Social Contacts and Mixing Patterns Relevant to the Spread of Infectious Diseases. *PLOS Medicine* **5**, 1–1. <https://doi.org/10.1371/journal.pmed.0050074> (Mar. 2008).
12. Champagne, S. R. & Oxner, R. *Surge in coronavirus cases linked to more Texans in their 20s getting sick, officials say* Accessed on 9/7/2020. 2020. <https://www.texastribune.org/2020/06/16/texas-coronavirus-spike-young-adults/>.
13. NY Times. *Florida and South Carolina Again Set Records as U.S. Coronavirus Cases Surge* Accessed on 9/7/2020. 2020. <https://www.nytimes.com/2020/06/20/world/coronavirus-updates.html#link-2204ff25>.
14. Buffa, P. *Coronavirus in the U.S.: Where cases are growing and declining* Accessed on 26/6/2020. 2020. <https://www.nationalgeographic.com/science/2020/05/graphic-tracking-coronavirus-infections-us/>.
15. Knowles, H *et al.* *Seven states report highest coronavirus hospitalizations since pandemic began* Accessed on 26/6/2020. 2020. <https://www.washingtonpost.com/nation/2020/06/23/coronavirus-live-updates-us/>.
16. Smith, M *et al.* *Coronavirus (Covid-19) Data in the United States* 2020. <https://github.com/nytimes/covid-19-data>.
17. reporter, C. *Census reporter* 2020. <https://censusreporter.org>.
18. Fullman, N *et al.* *State-level social distancing policies in response to COVID-19 in the US* 2020. <http://www.covid19statepolicy.org>.
19. Verity, R *et al.* Estimates of the severity of COVID-19 disease. *Lancet Infect Dis* (2020).
20. Walker, P *et al.* The impact of COVID-19 and strategies for mitigation and suppression in low- and middle-income countries. *Science*. <https://www.imperial.ac.uk/mrc-global-infectious-disease-analysis/news--wuhan-coronavirus/> (2020).
21. Liu, Y, Gayle, A, Wilder-Smith, A & Rocklöv, J. The reproductive number of COVID-19 is higher compared to SARS coronavirus. *Journal of Travel Medicine*. ISSN: 17088305 (2020).
22. Carpenter, B *et al.* *Stan: A Probabilistic Programming Language*. *Journal of Statistical Software* **76**, 1–32. ISSN: 1548-7660. <http://www.jstatsoft.org/v76/i01/> (2017).

23. Gneiting, T. & Raftery, A. E. Strictly Proper Scoring Rules, Prediction, and Estimation. *Journal of the American Statistical Association* **102**, 359–378. eprint: <https://doi.org/10.1198/016214506000001437>. <https://doi.org/10.1198/016214506000001437> (2007).
24. Marchant, R, Samia, N. I., Rosen, O, Tanner, M. A. & Cripps, S. *Learning as We Go: An Examination of the Statistical Accuracy of COVID19 Daily Death Count Predictions* 2020. [arXiv:2004.04734](https://arxiv.org/abs/2004.04734).
25. Reston, M., Sgueglia, K. & Mossburg, C. *Governors on East and West coasts form pacts to decide when to reopen economies* 2020. <https://edition.cnn.com/2020/04/13/politics/states-band-together-reopening-plans/index.html>.



## A Ratio of reported cases to estimated infections

We compare the weekly moving average of the percentage of reported cases to mean estimated infections for the time period of the model. We use the same model formulation without cases here to illustrate two points. First, the percentage is small initially, which is why we do not use cases in the model until 11 May 2020. Second, towards the end of May, sufficient tests are being done that they are informative to our model and we can estimate an infection ascertainment ratio, see Section 5 for further details. Percentages may be greater than 100% when our model estimates fewer cases than were reported. This occurs in states with little data.

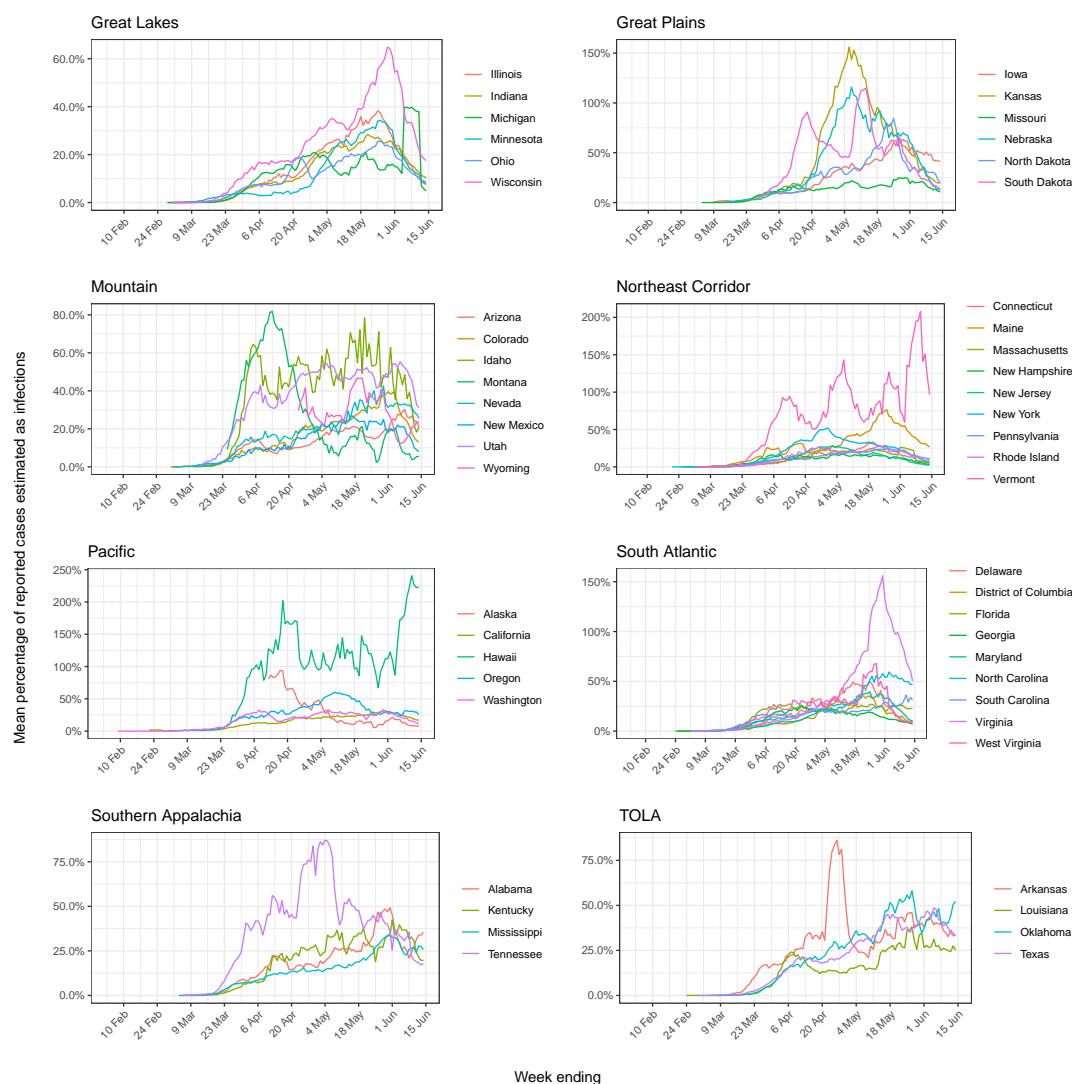

Figure 4: Weekly moving average of the percentage of reported cases to mean estimated infections for the time period of the model.

## B State-level $R_t$ values

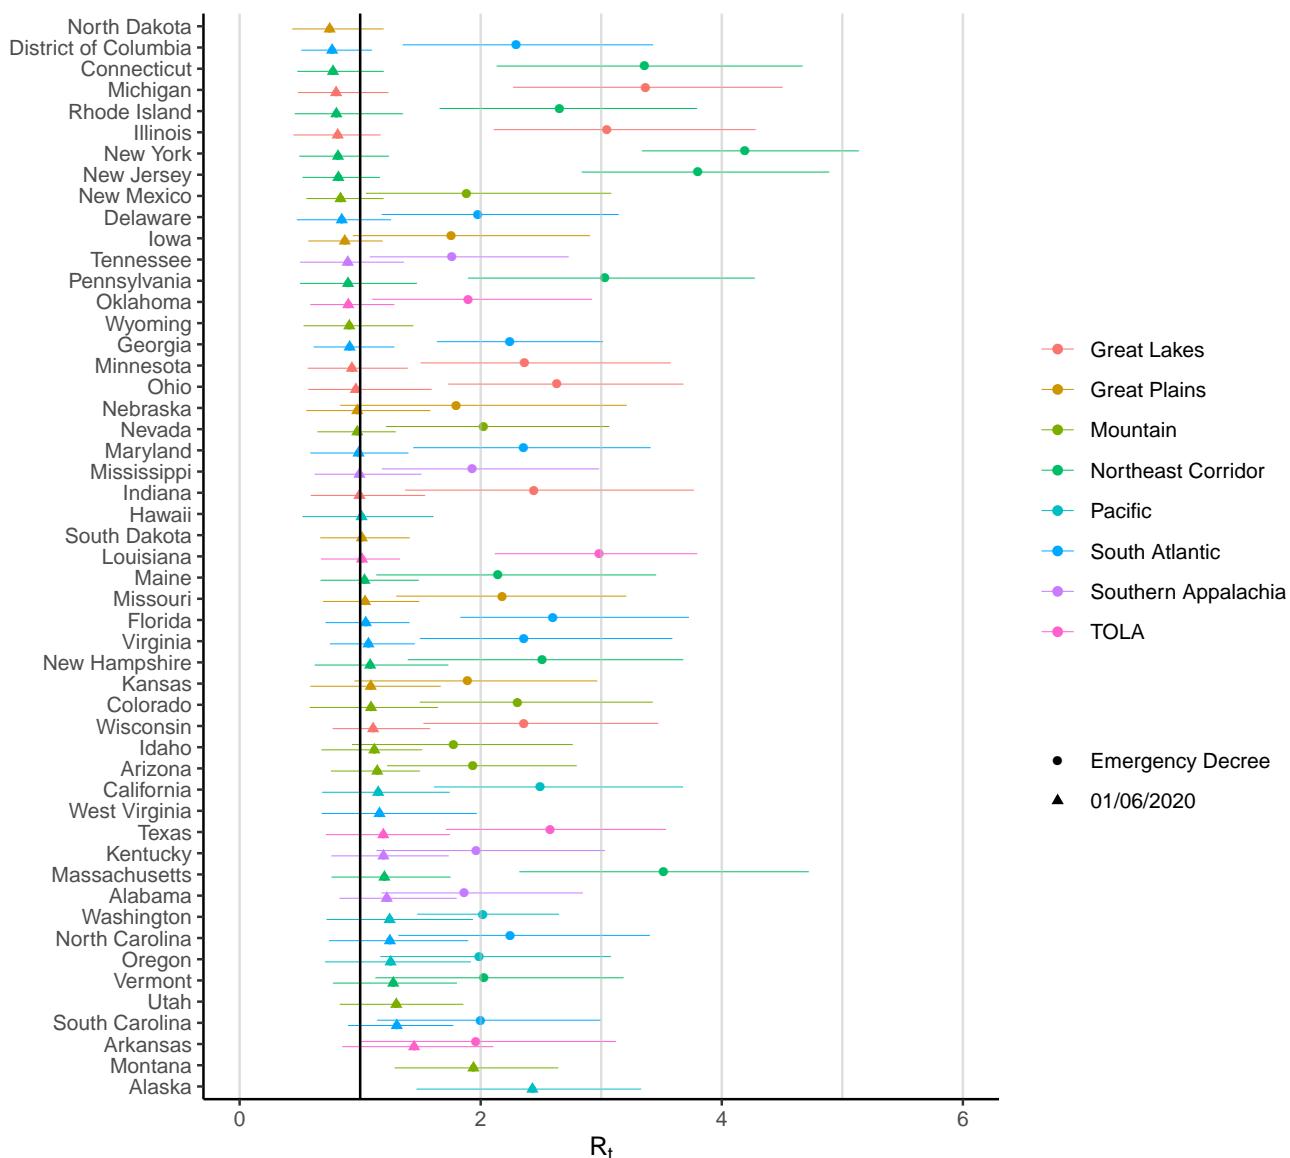

Figure 5: State-level estimates of  $R_{t=EmergencyDecree}$  and the average  $R_t$  over the week ending 01 June 2020. The colours indicate regional grouping as shown in Figure 12. We do not include estimates of  $R_{t=EmergencyDecree}$  for Alaska, Hawaii, Montana, North Dakota, South Dakota, Utah, West Virginia and Wyoming as Emergency Decree was declared in these states before we start modelling these states.

## C Model predictions for all states

State-level estimates of infections, deaths and  $R_t$ . Left: daily number of deaths, brown bars are reported deaths, blue bands are predicted deaths, dark blue 50% credible interval (CI), light blue 95% CI. Middle: daily number of infections, brown bars are reported infections, blue bands are predicted infections, CIs are same as left. The number of daily infections estimated by our model drops immediately after an intervention, as we assume that all infected people become immediately less infectious through the intervention. Afterwards, if the  $R_t$  is above 1, the number of infections will start growing again. Right: time-varying reproduction number  $R_t$  dark green 50% CI, light green 95% CI. Icons are interventions shown at the time they occurred.

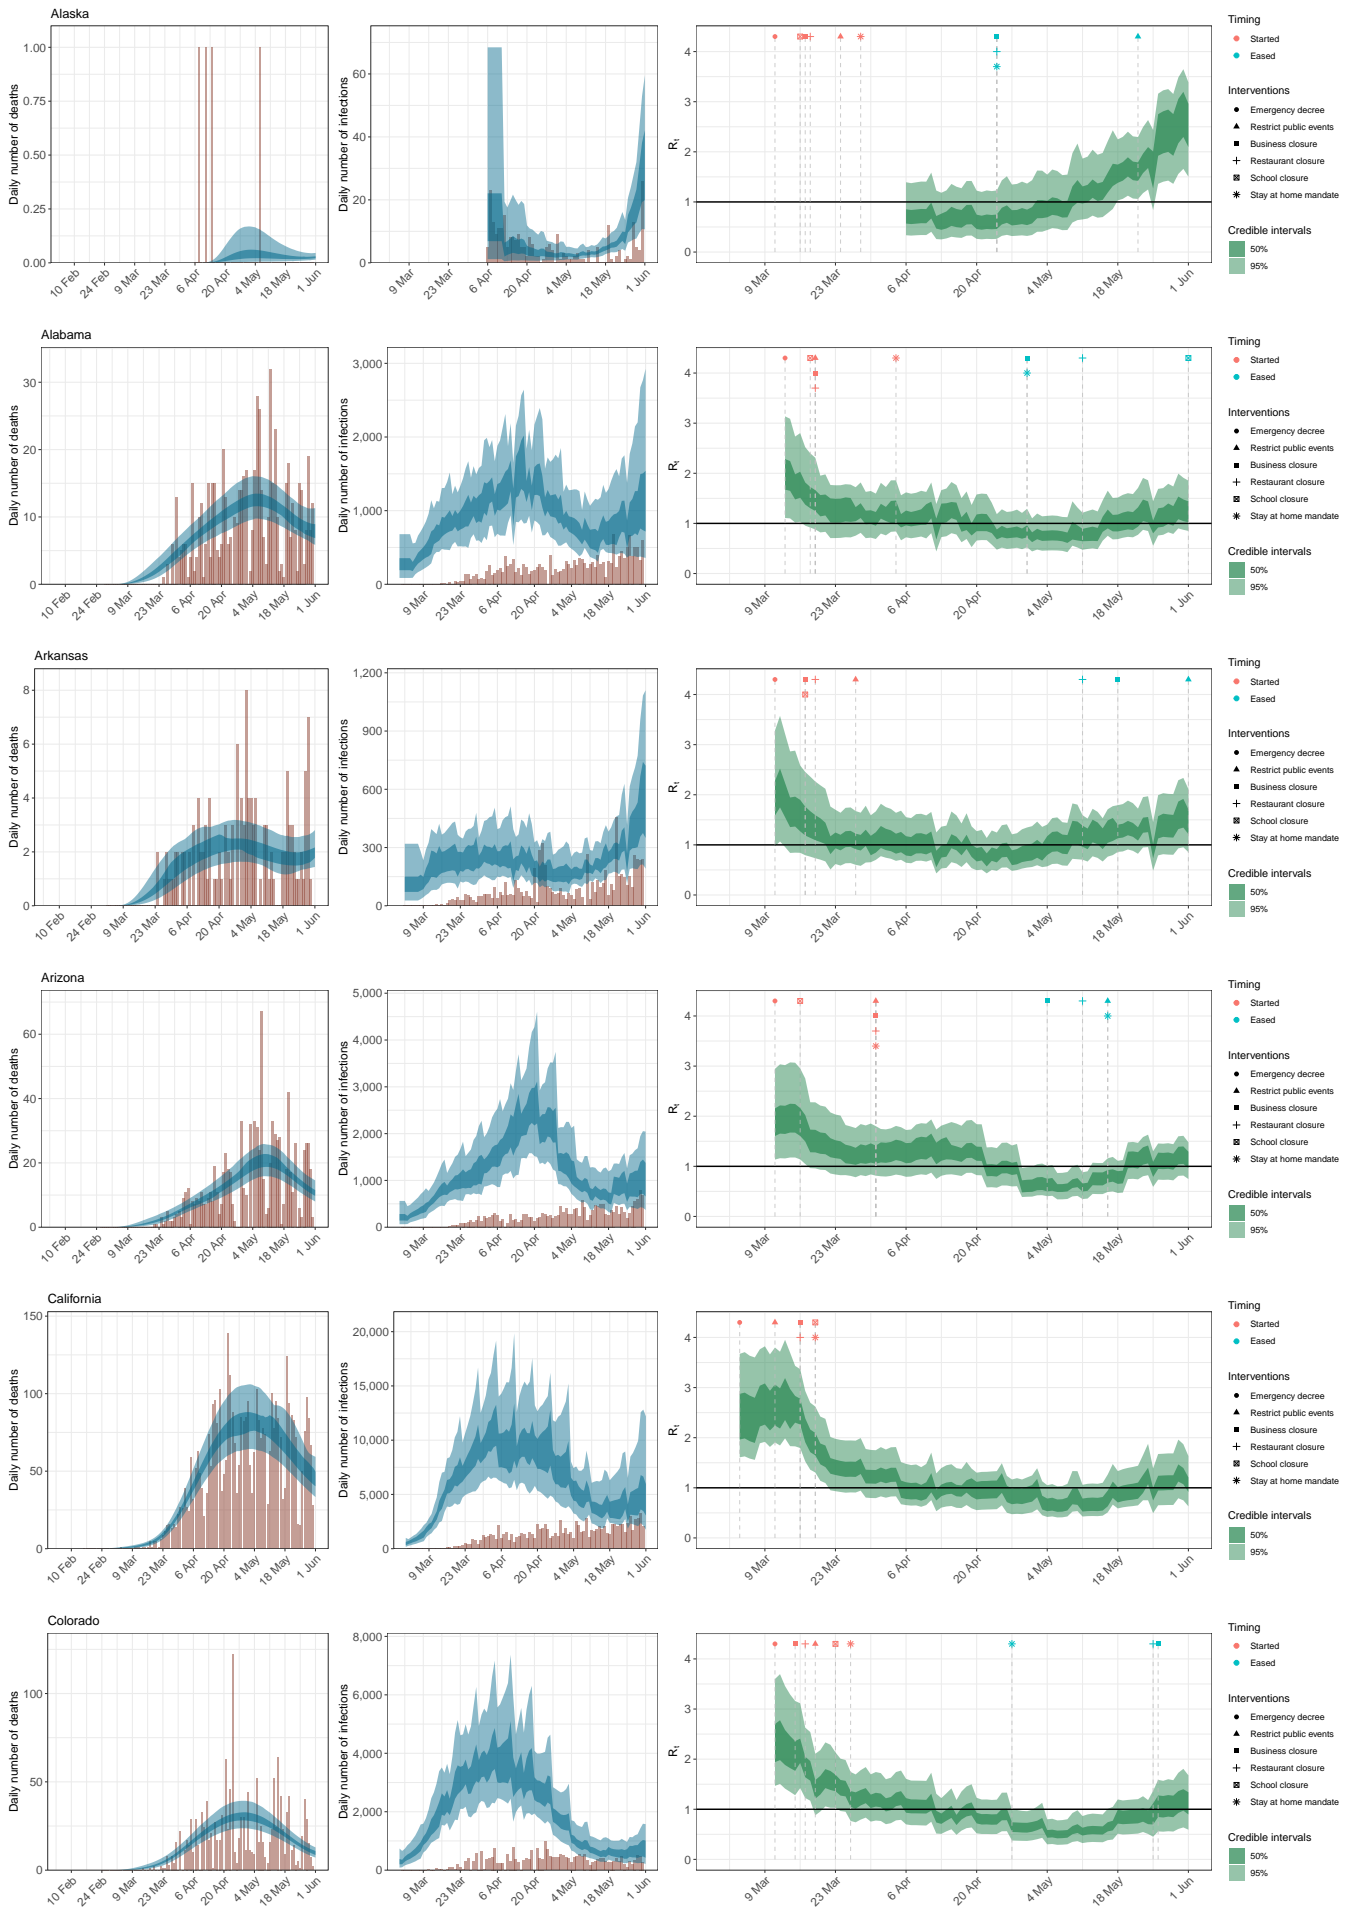

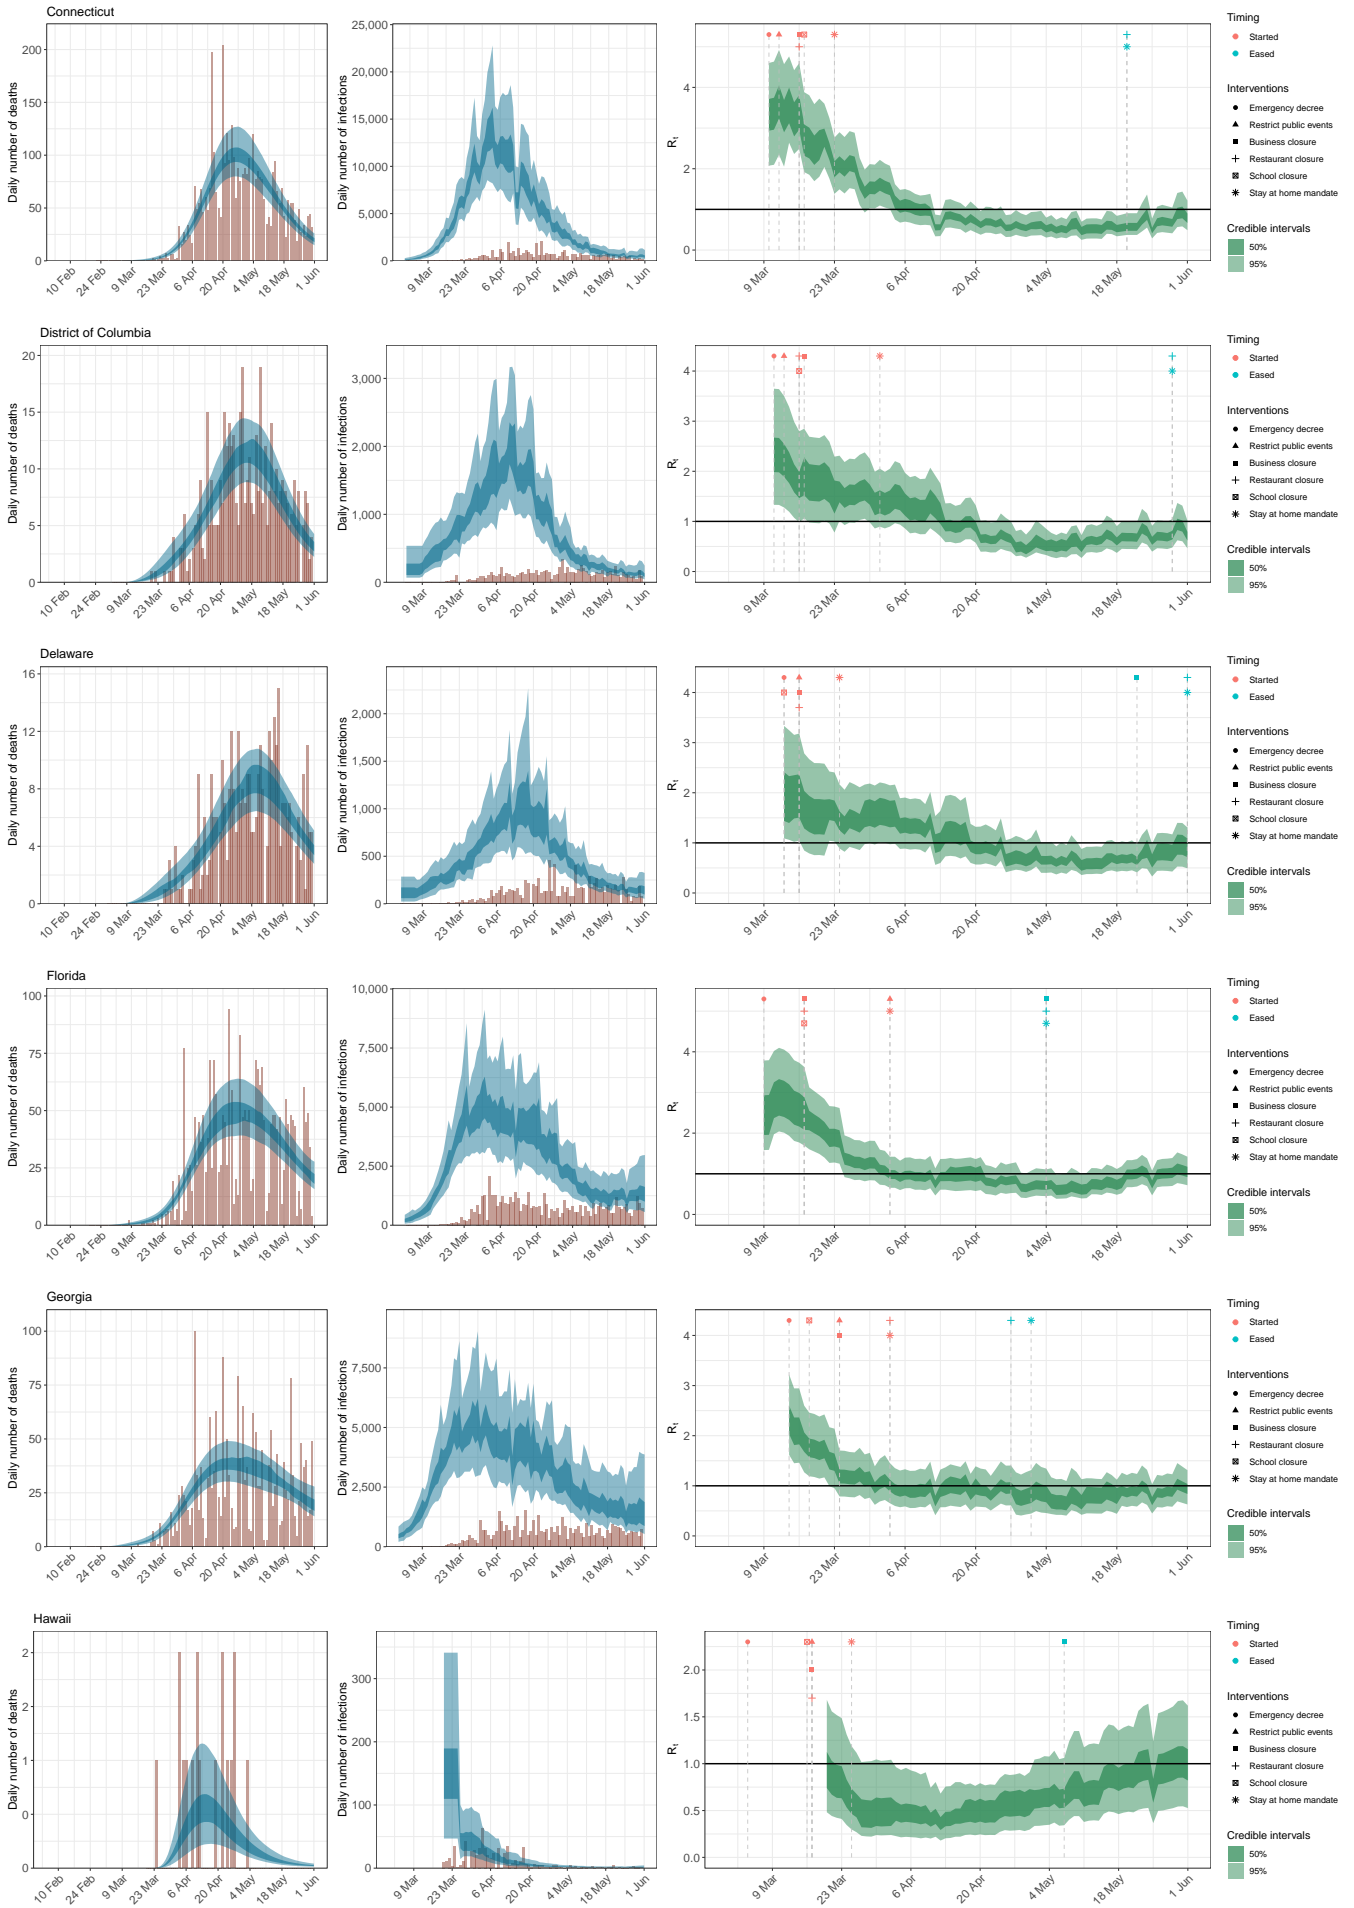

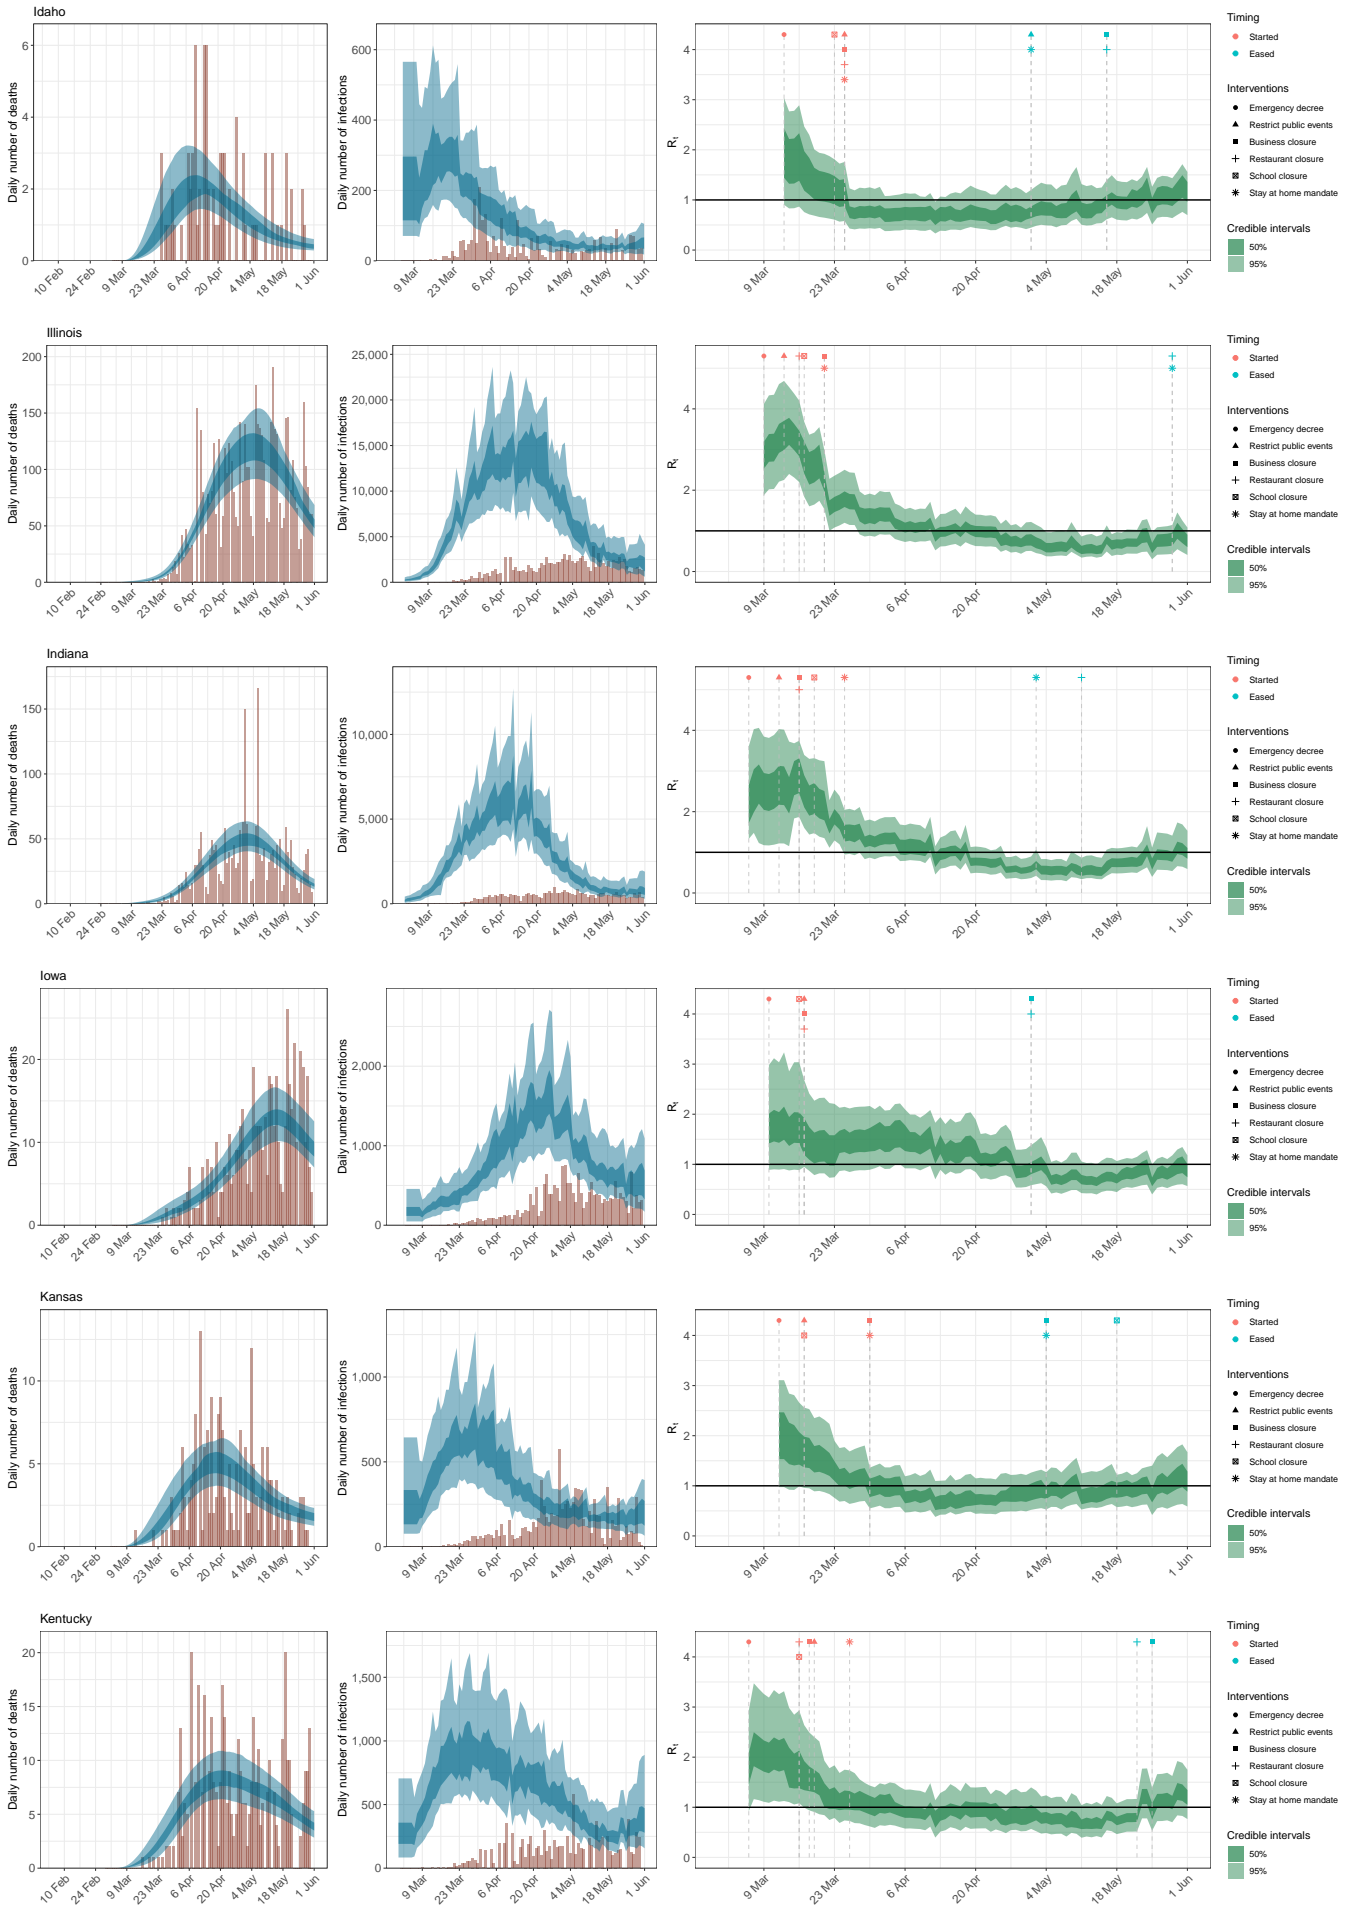

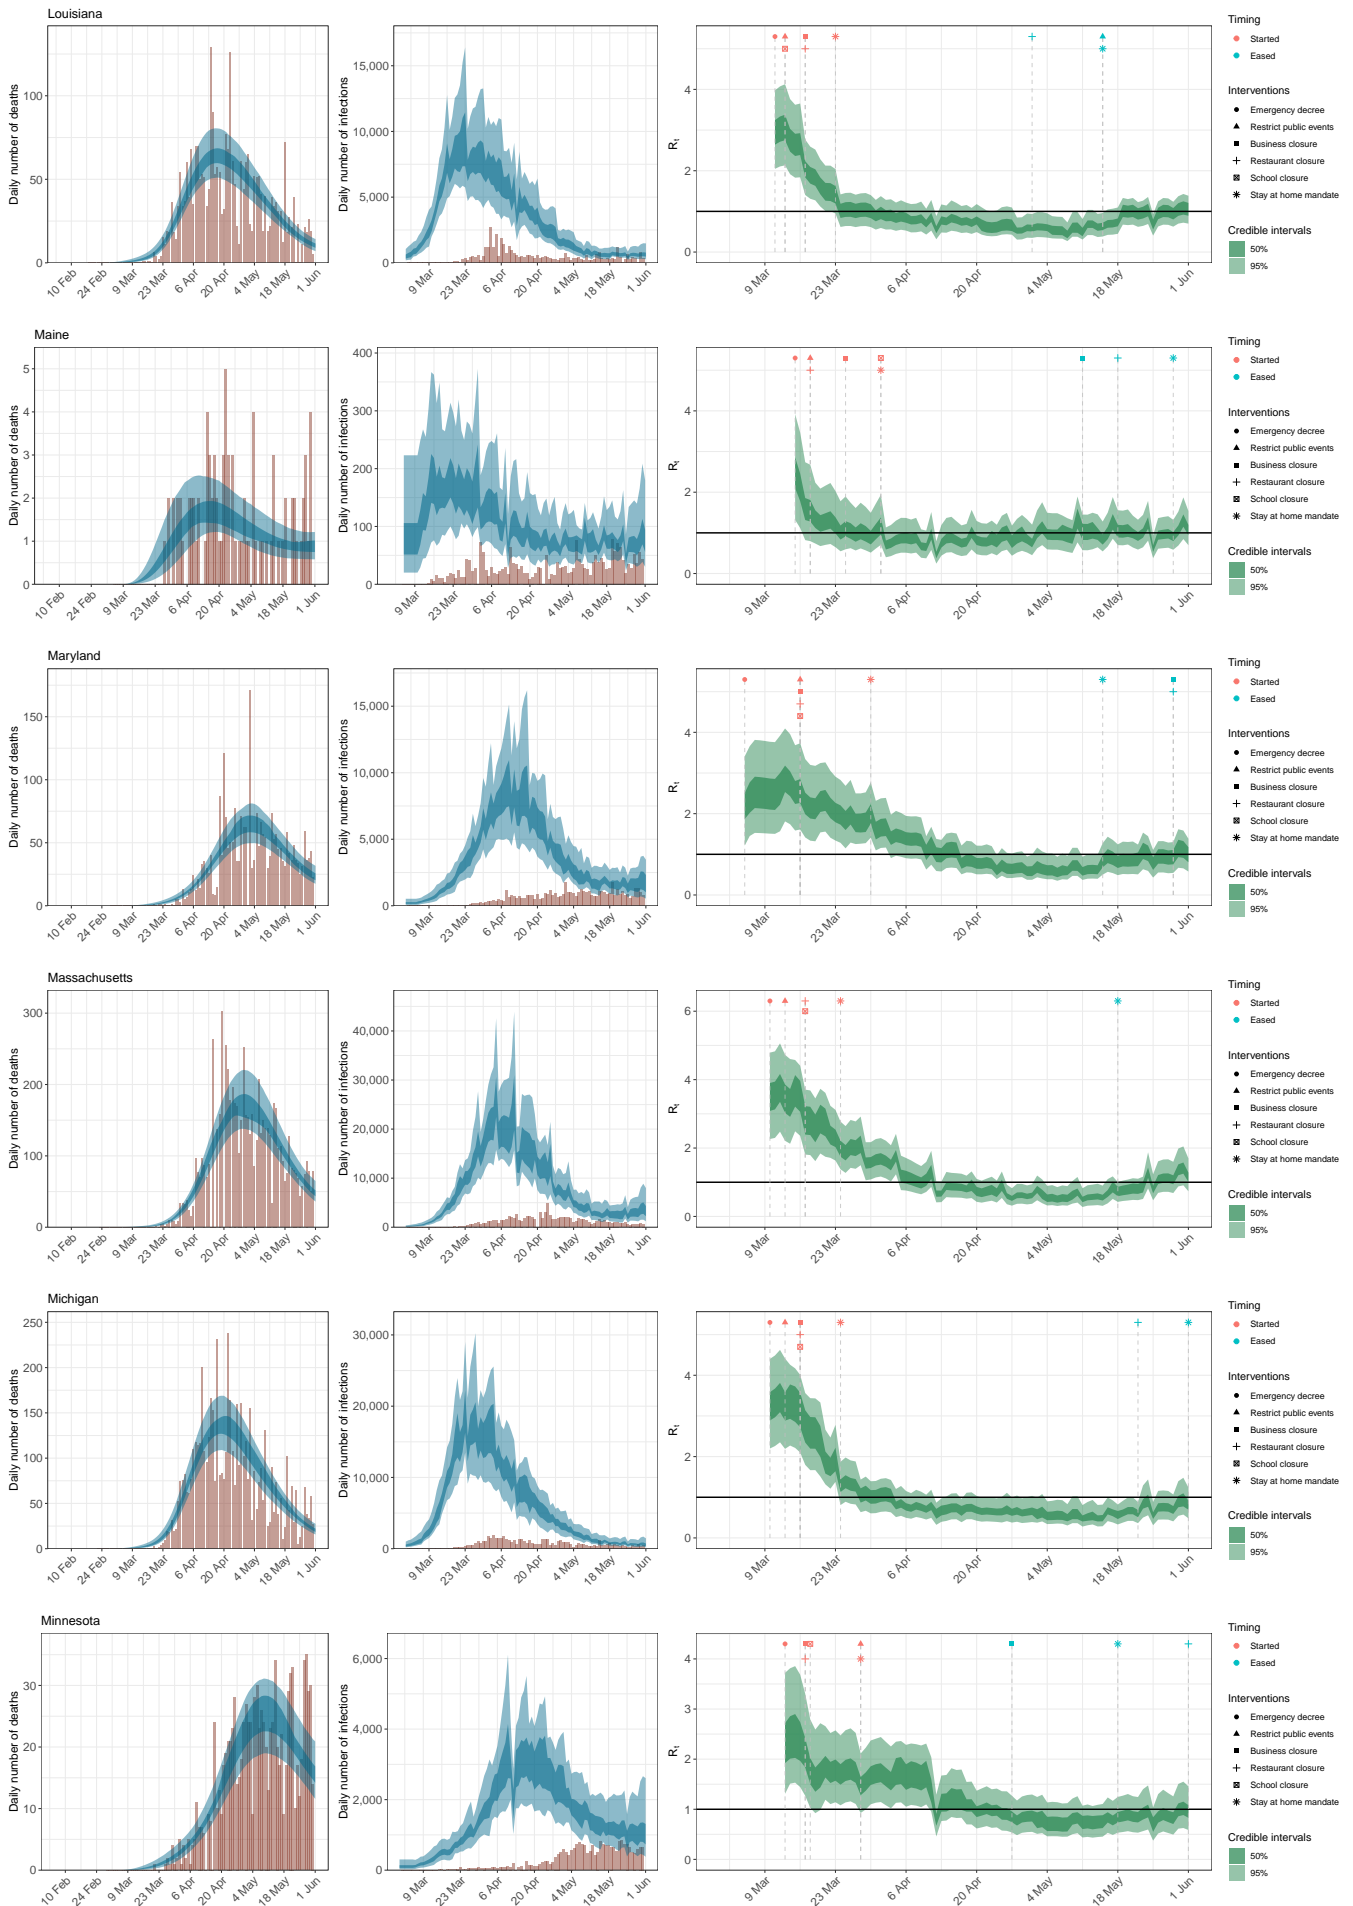

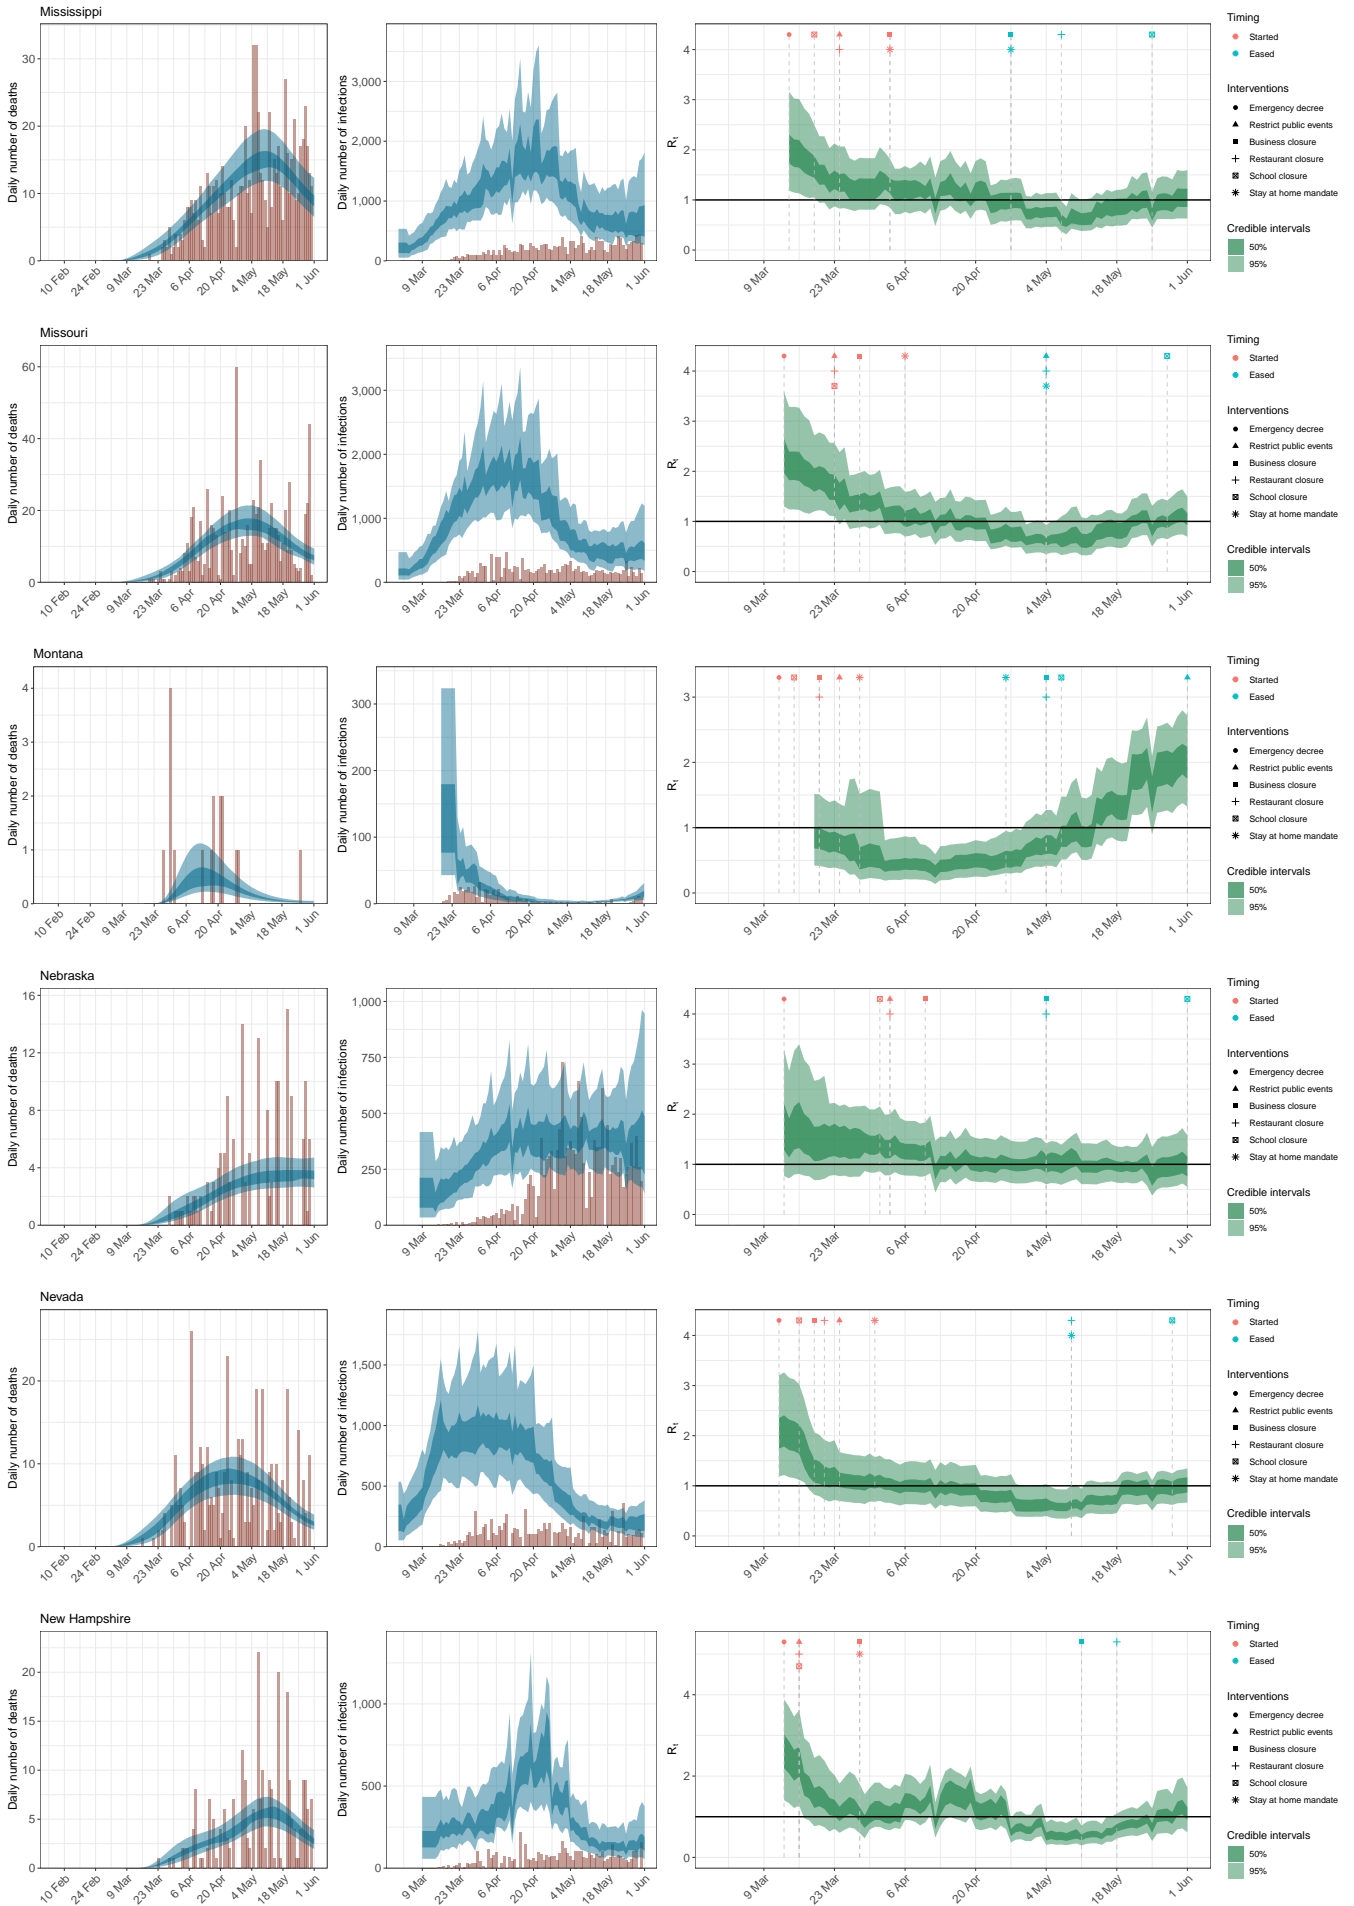

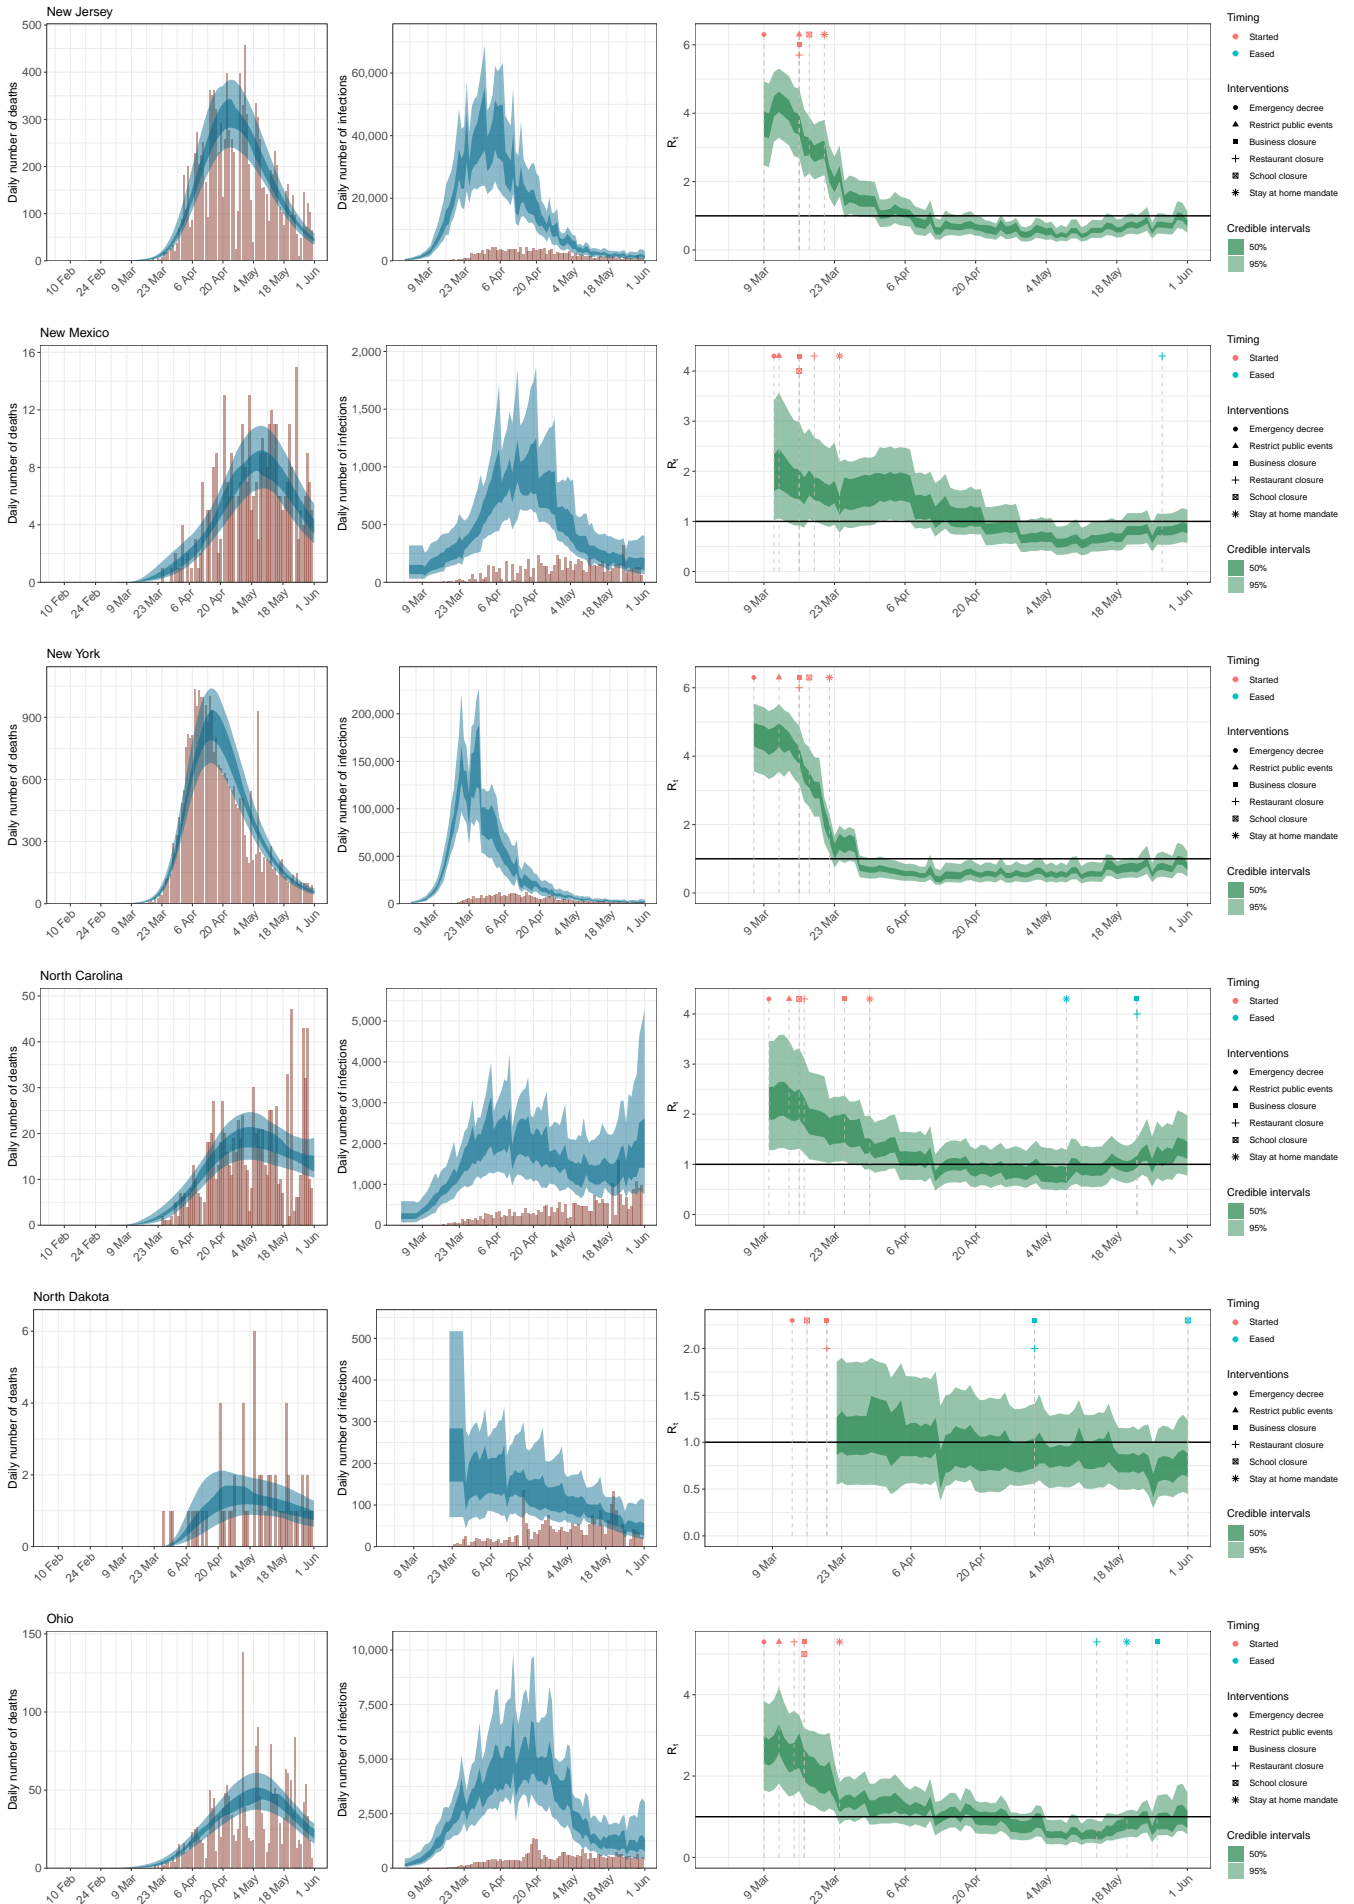



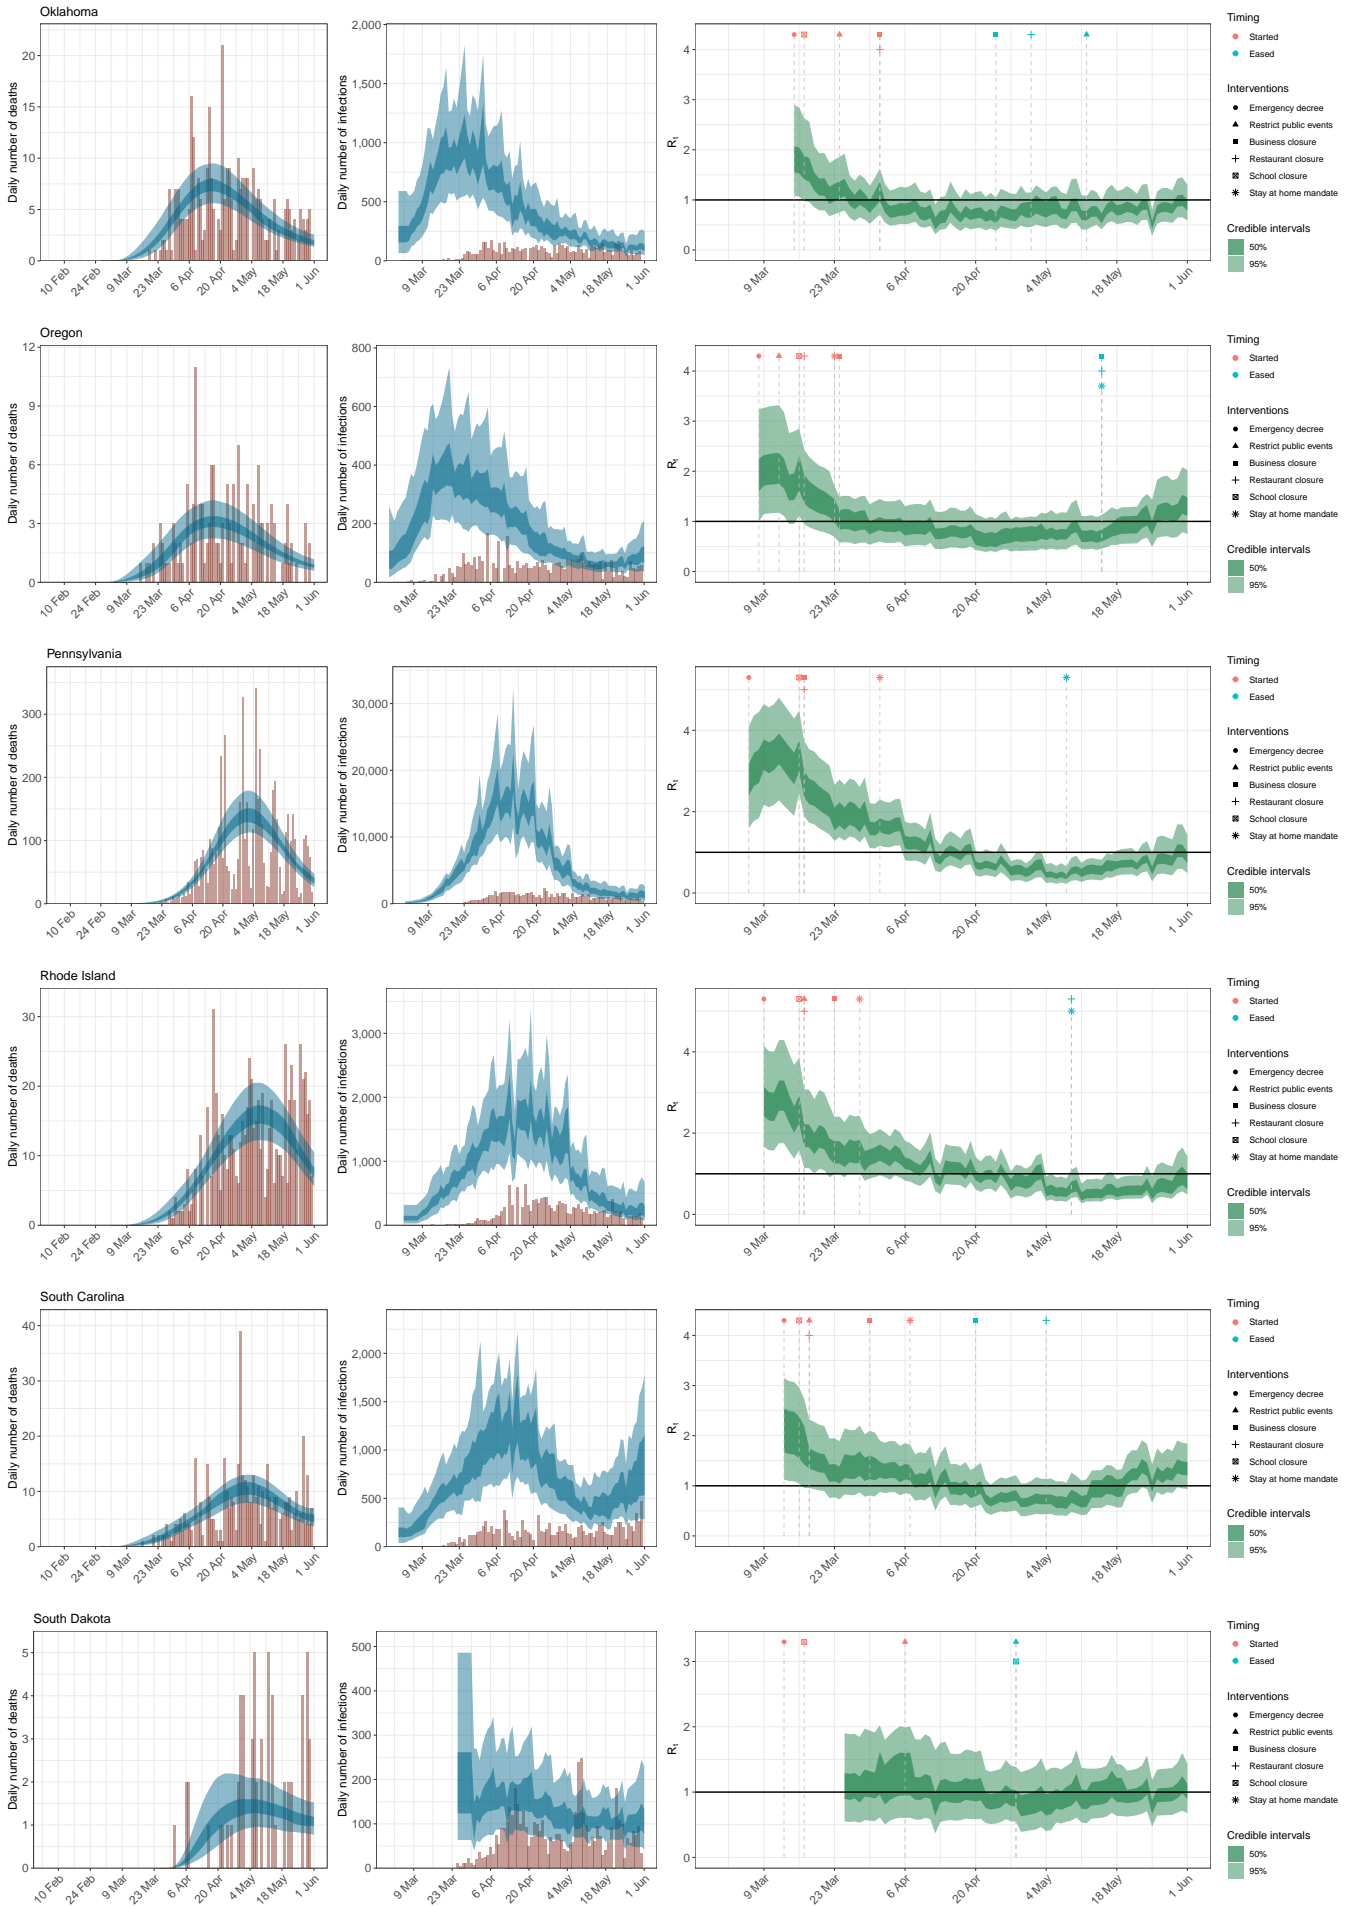

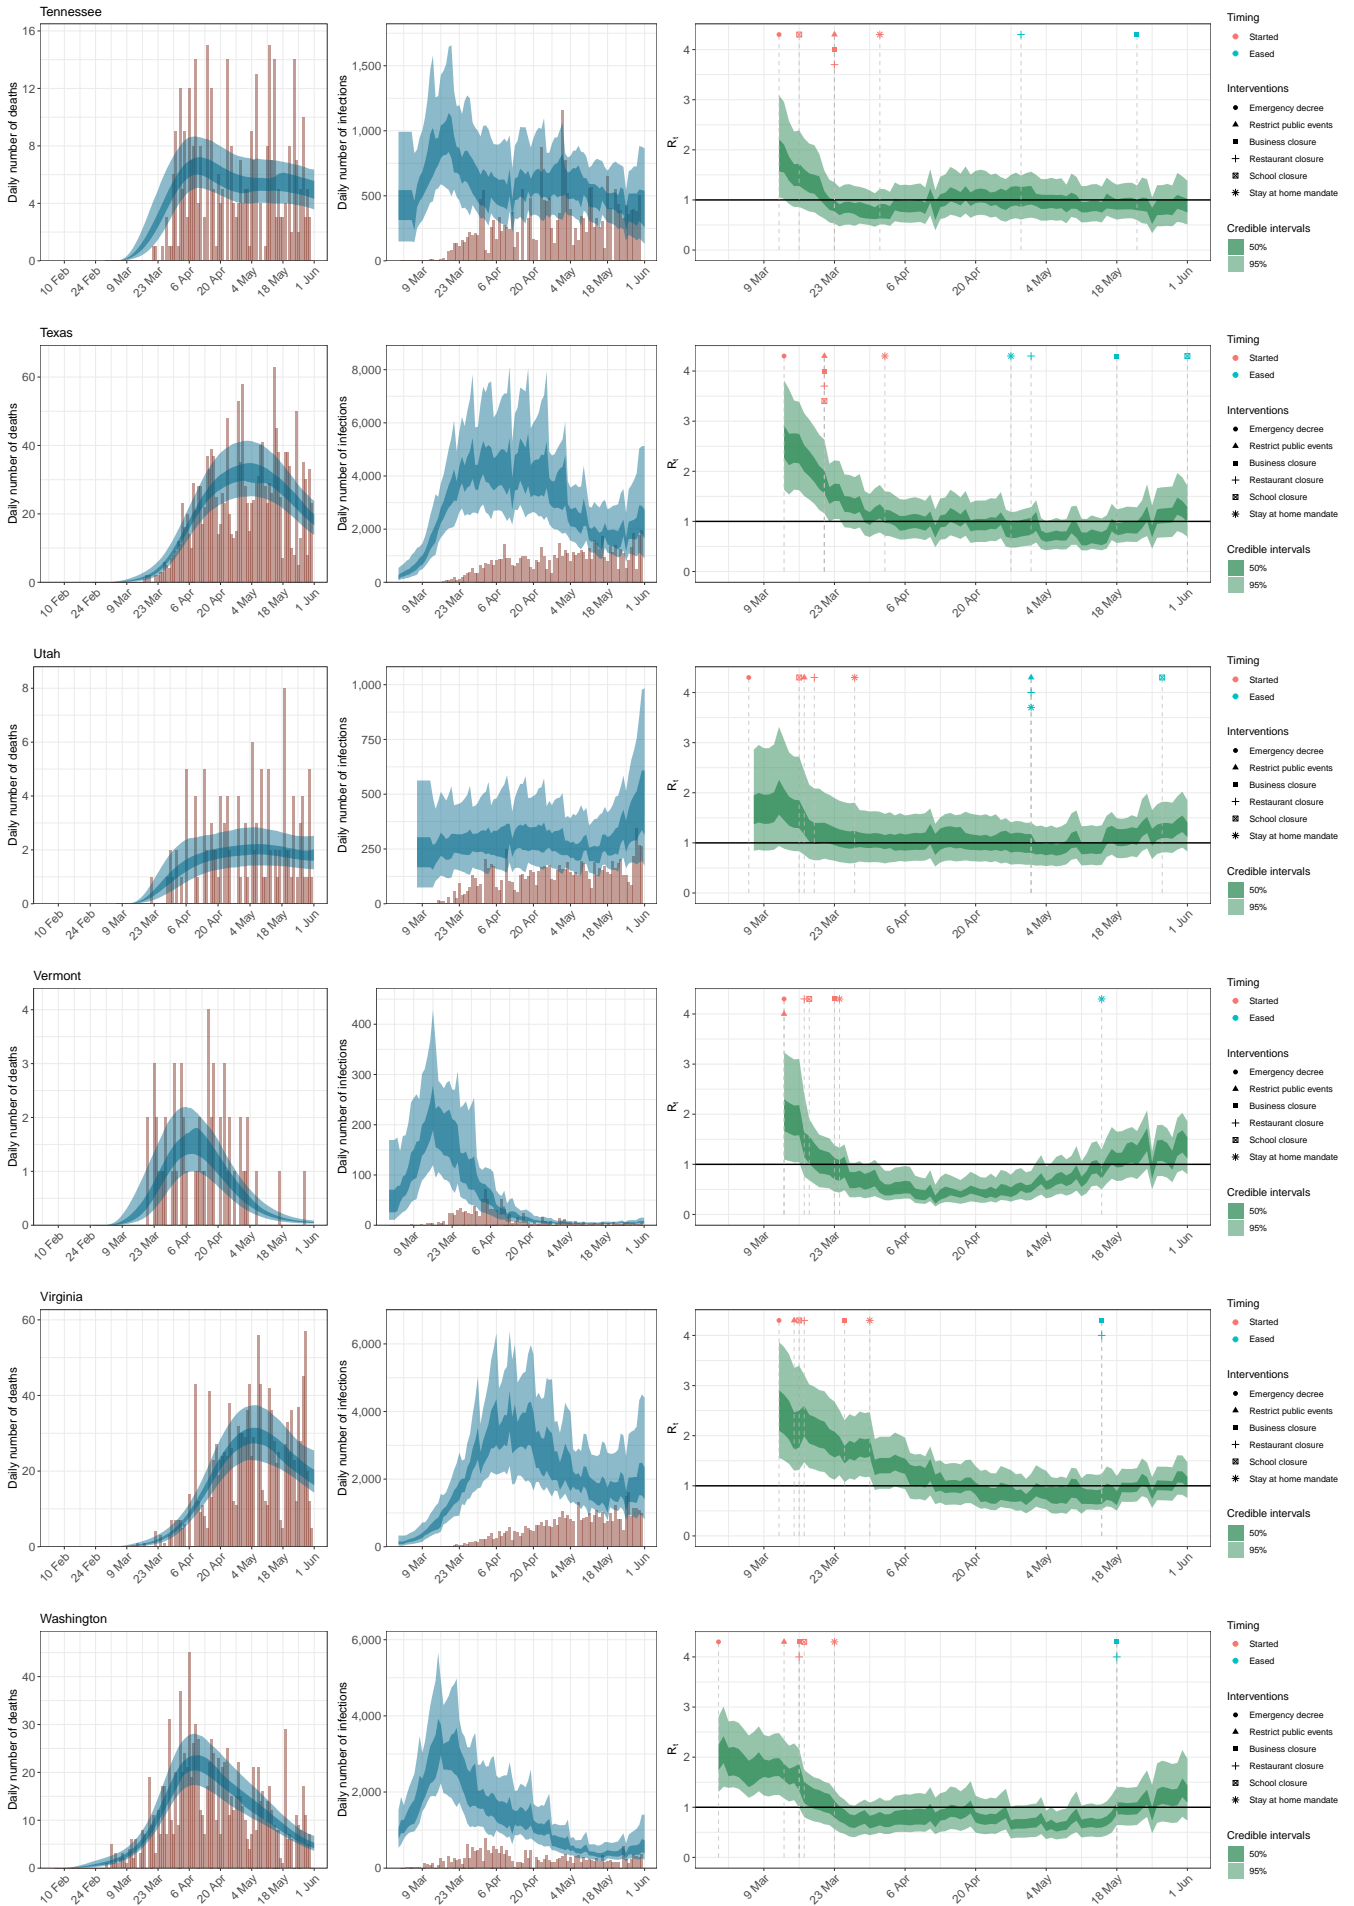

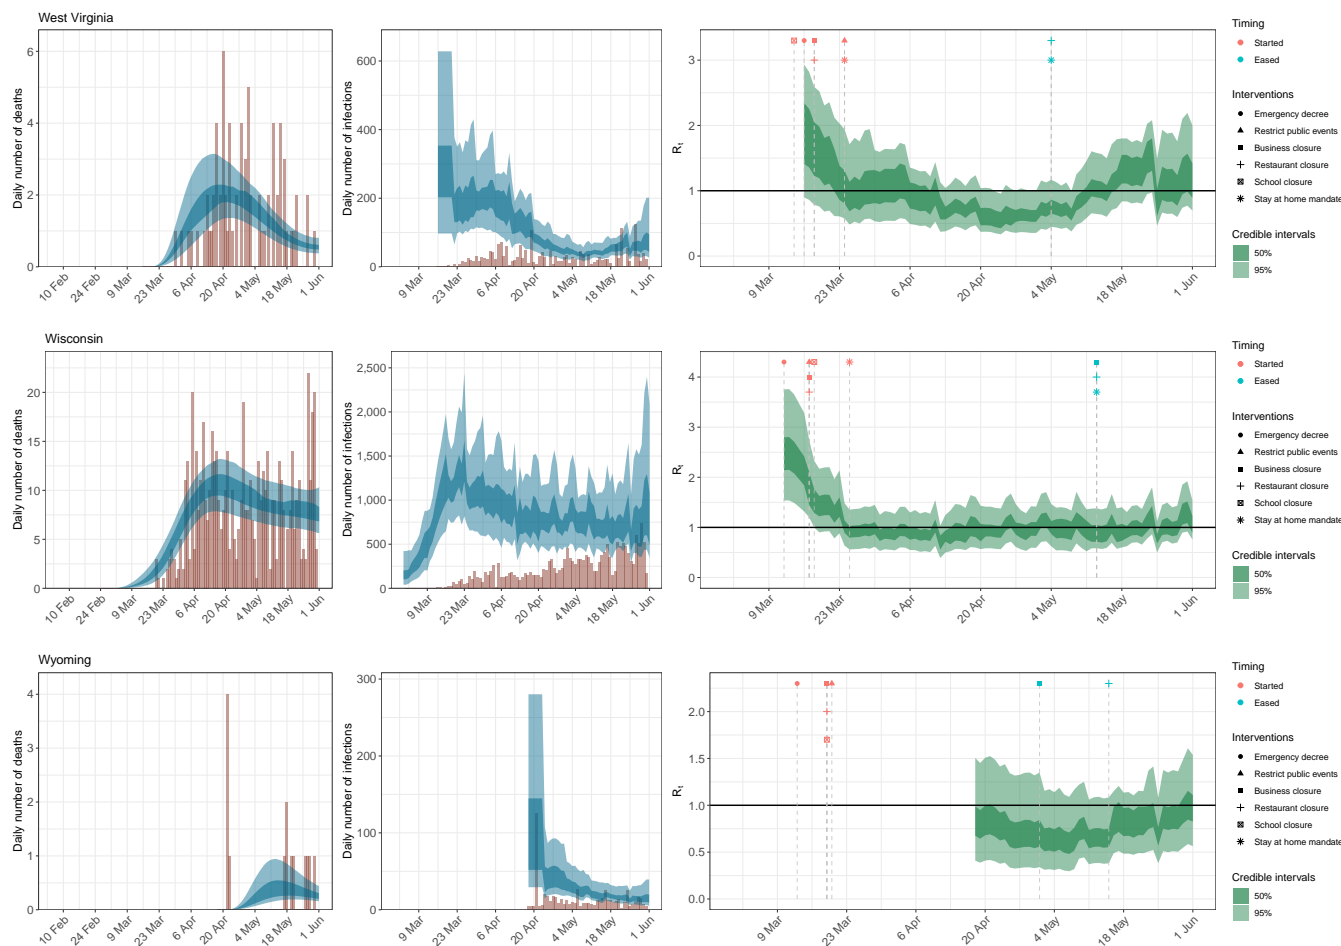

## D Effect sizes

We plot estimates of the posterior mean effect sizes and 95% credible intervals for each mobility category. The relative % reduction in  $R_t$  metric is interpreted as follows: the larger the percentage, the more  $R_t$  decreases, meaning the disease spreads less; a 100% relative reduction ends disease transmissibility entirely. The smaller the percentage, the less effect the covariate has on transmissibility. A 0% relative reduction has no effect on  $R_t$  and thus no effect on the transmissibility of the disease, while a negative percent reduction implies an increase in transmissibility.

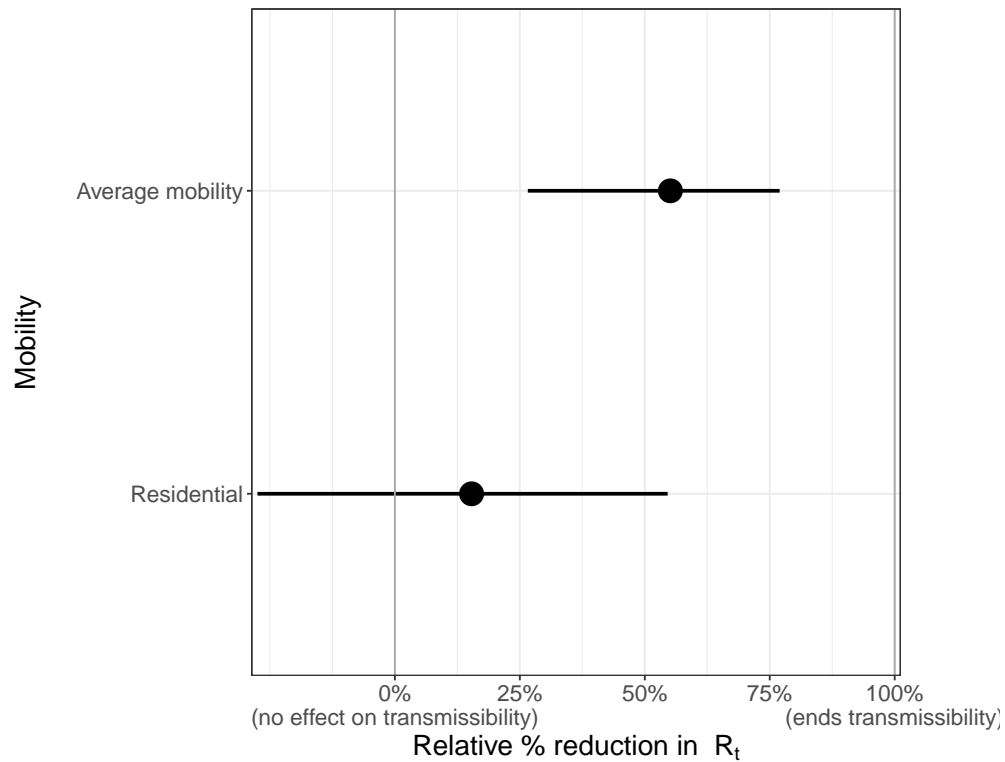

Figure 6: Country level covariate effect sizes assuming mobility stopped entirely (100% reduction in average mobility) and residential mobility was increased fully (100% increase in residential mobility): Average mobility combines “retail & recreation”, “grocery & pharmacy”, “workplaces”.

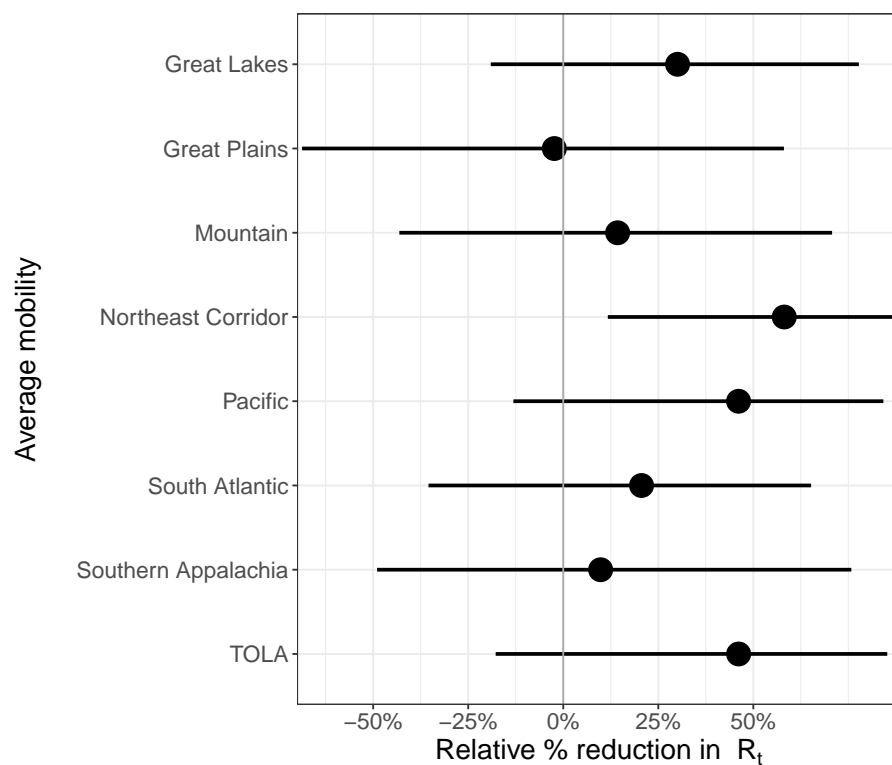

Figure 7: Regional average mobility covariate effect size plots assuming mobility stopped entirely (100% reduction in average mobility).

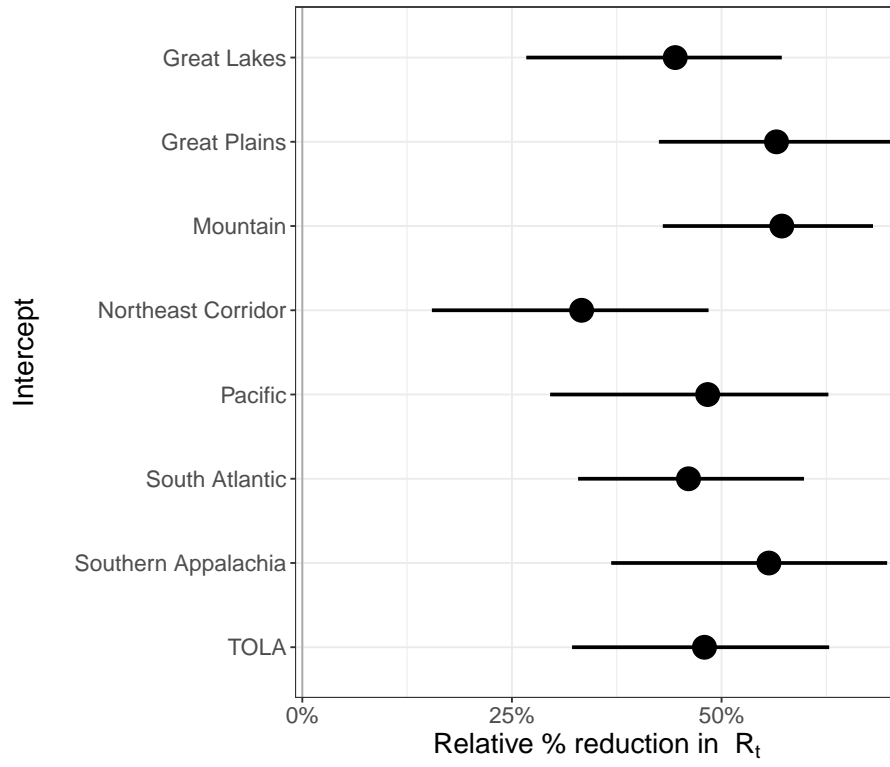

Figure 8: Regional intercept covariate effect size plots.

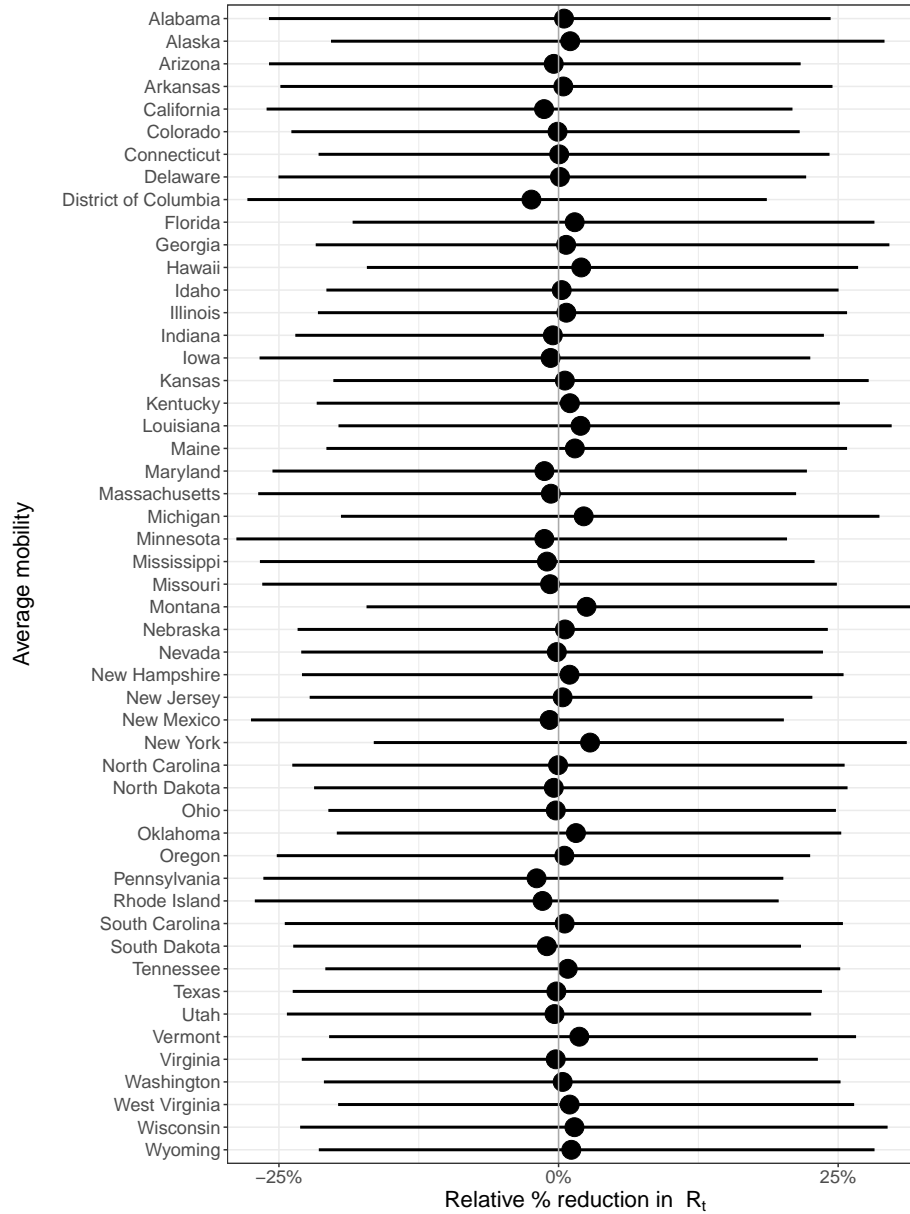

Figure 9: State-level covariate effect size plots assuming mobility stopped entirely (100% reduction in average mobility).

## E Forecast evaluation

We evaluate three-week ahead model forecasts (days  $t \in \{T + 1, \dots, T + 21\}$ ) for our model using two metrics. The first metric is the mean absolute error (MAE), which is given by

$$\text{MAE}_{t,m} = \frac{1}{S} \sum_{s=1}^S |\hat{y}_{t,m}^s - y_{t,m}|, \quad t = T + 1, \dots, T + 21,$$

where  $\hat{y}_{t,m}^1, \dots, \hat{y}_{t,m}^S$  are  $S$  posterior predictive samples of some quantity (daily deaths or cumulative deaths) on day  $t$  in country  $m$  and  $y_{t,m}$  is the observed value of the corresponding quantity. The continuous ranked probability score (CRPS) is a generalisation of MAE to probabilistic forecasts and can be estimated using [23]

$$\text{CRPS}_{t,m} = \frac{1}{S} \sum_{s=1}^S |\hat{y}_{t,m}^s - y_{t,m}| - \frac{1}{2S^2} \sum_{j=1}^S \sum_{k=1}^S |\hat{y}_{t,m}^j - \hat{y}_{t,m}^k|, \quad t = T + 1, \dots, T + 21.$$

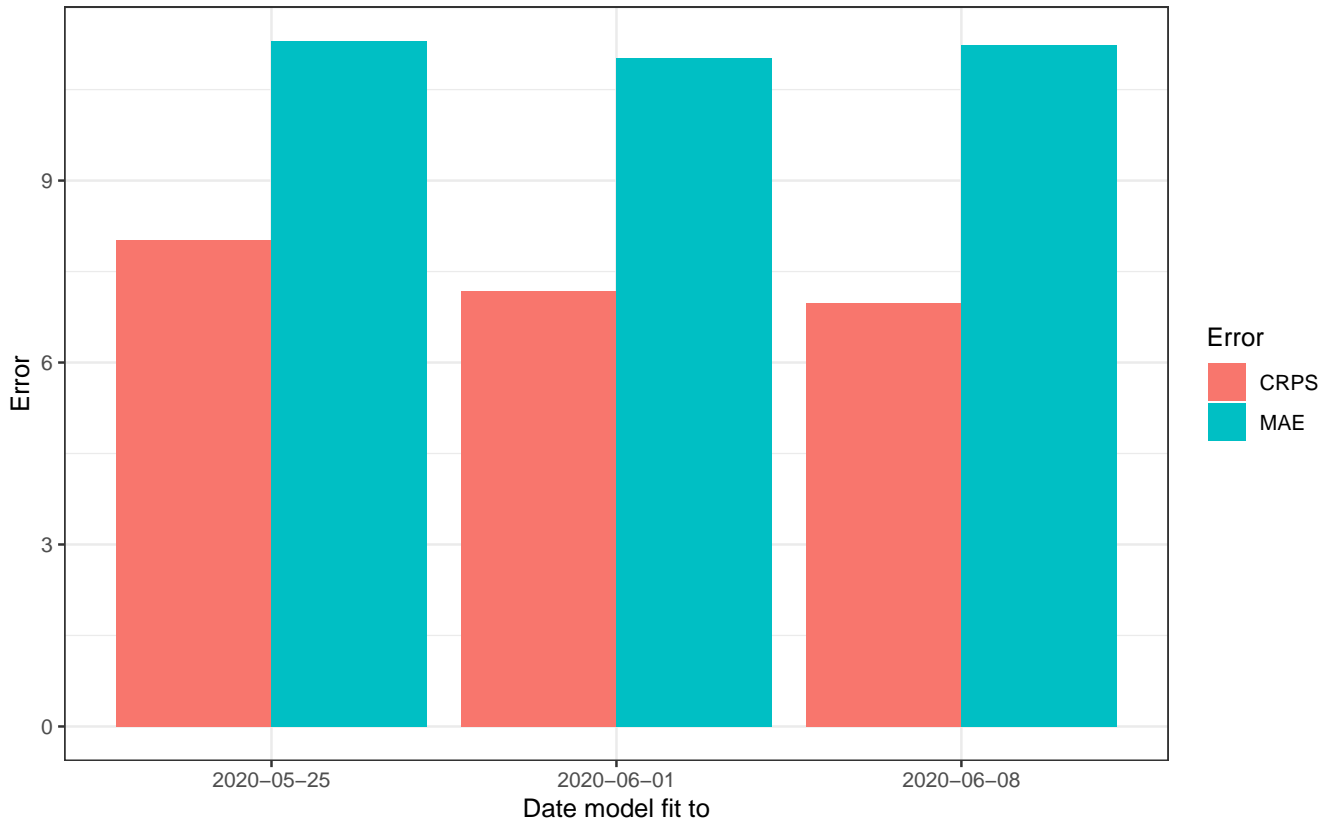

Figure 10: Error in 21 day forecasts for three models fit until 25th May, 1st June and 8th June.

Figure 10 shows the MAE and CRPS for three different forecast periods. In addition to the forecast results shown in Section 2.4, we also fit our model up to the 25th May and 8th June and show the error in our 21 day forecasts. For both MAE and CRPS lower values indicate a more accurate forecast. We get similar error between our three model fits for our different metrics.

The forecasts were also evaluated using the mean coverage of their 95% and 50% credible intervals. If model uncertainty is well-calibrated then the observed quantities will fall outside of the 95% credible intervals 5% of the time and 50% of the time for the 50% credible intervals. Recent work has highlighted that other prominent models do not meet this criterion, which suggests that their uncertainty estimates are not well-calibrated [24]. The mean coverage of the 95% credible interval in a time period starting at time  $t_0$  with length  $L$  is given by

$$\frac{1}{L} \sum_{t=t_0+1}^{t_0+1+L} 1 \left( y_{t,m} \in \left[ p_{2.5}(\{\hat{y}_{t,m}^s\}_{s=1}^S), p_{97.5}(\{\hat{y}_{t,m}^s\}_{s=1}^S) \right] \right),$$

where  $1(\cdot)$  is the indicator function and  $p_z(\{\hat{y}_{t,m}^s\}_{s=1}^S)$  is the  $z$ -th percentile of the samples on day  $t$  in country  $m$ . The mean coverage of the 50% credible interval is

$$\frac{1}{L} \sum_{t=t_0+1}^{t_0+1+L} 1 \left( y_{t,m} \in \left[ p_{25}(\{\hat{y}_{t,m}^s\}_{s=1}^S), p_{75}(\{\hat{y}_{t,m}^s\}_{s=1}^S) \right] \right).$$

The coverage was calculated for each state individually and then the mean across all the 50 state and the District of Columbia was computed.

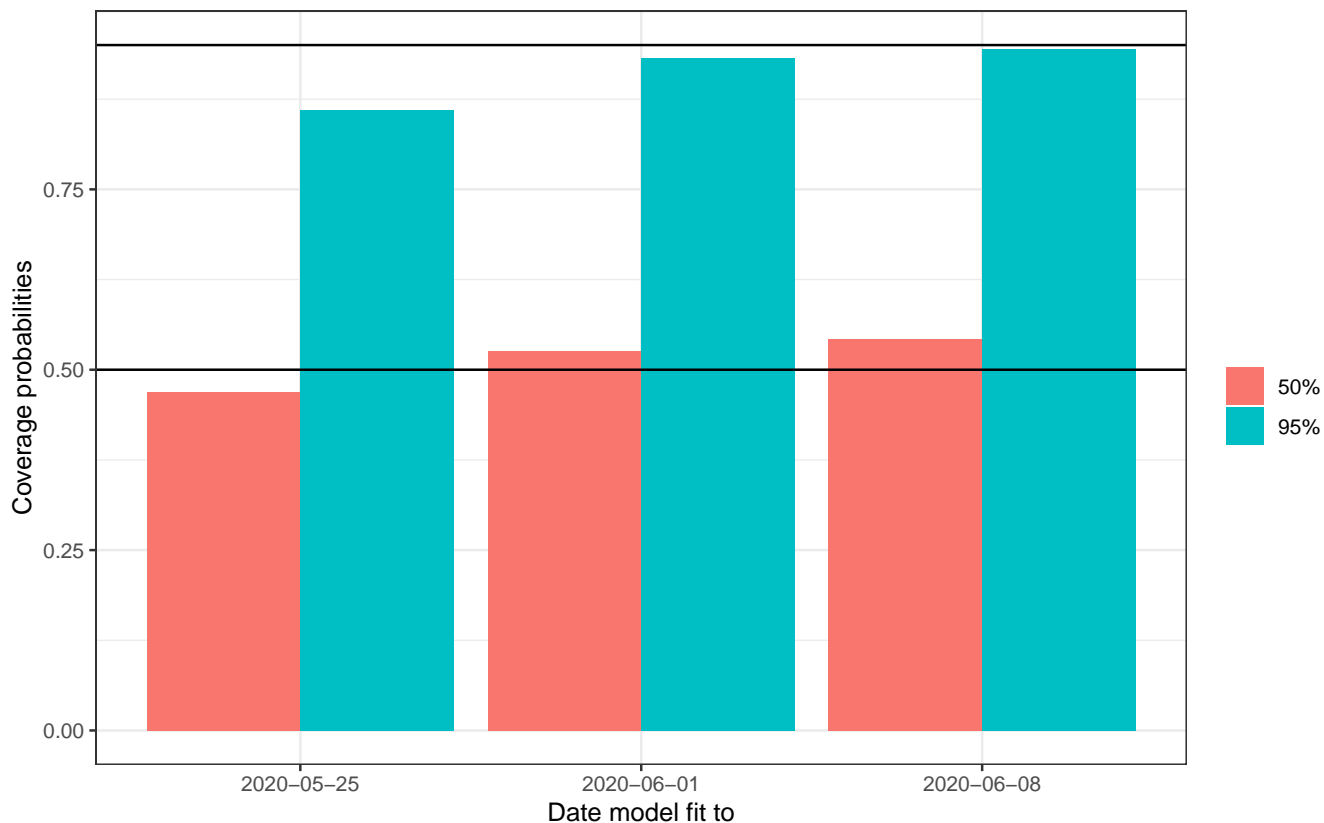

Figure 11: Coverage probabilities for 21 day forecasts for three models with data fit to 25th May, 1st June and 8th June.

These coverage results suggest that both the 95 and 50% credible intervals are well-calibrated for our three models. The models fit up until 1st June and 8th June have coverage probabilities closer to 0.95 for the 95% credible intervals. We hypothesise this is because they include more in data in the forecast.

## F Mobility trends

In Figure 12 we show the Google mobility trends [4] across the 50 states of the US and the District of Columbia. In our model, we use the time spent at one's residence and the number of visits to grocery stores, pharmacies, recreation centres, and workplaces. Our regions are based on US Census Divisions, modified to account for coordination between groups of state governments [25]. These trends are relative to a state-dependent baseline, which was calculated shortly before the COVID-19 epidemic. For example, a value of  $-20\%$  in the average trend means that individuals, on average, are visiting 20% less shops, recreation places and workplaces than before the epidemic. We overlay the timing of two major state-wide NPIs (stay at home and emergency decree) on Figure 12 (see [18] for details). We note intuitive changes in mobility such as the spike on 11th and 12th April for Easter.



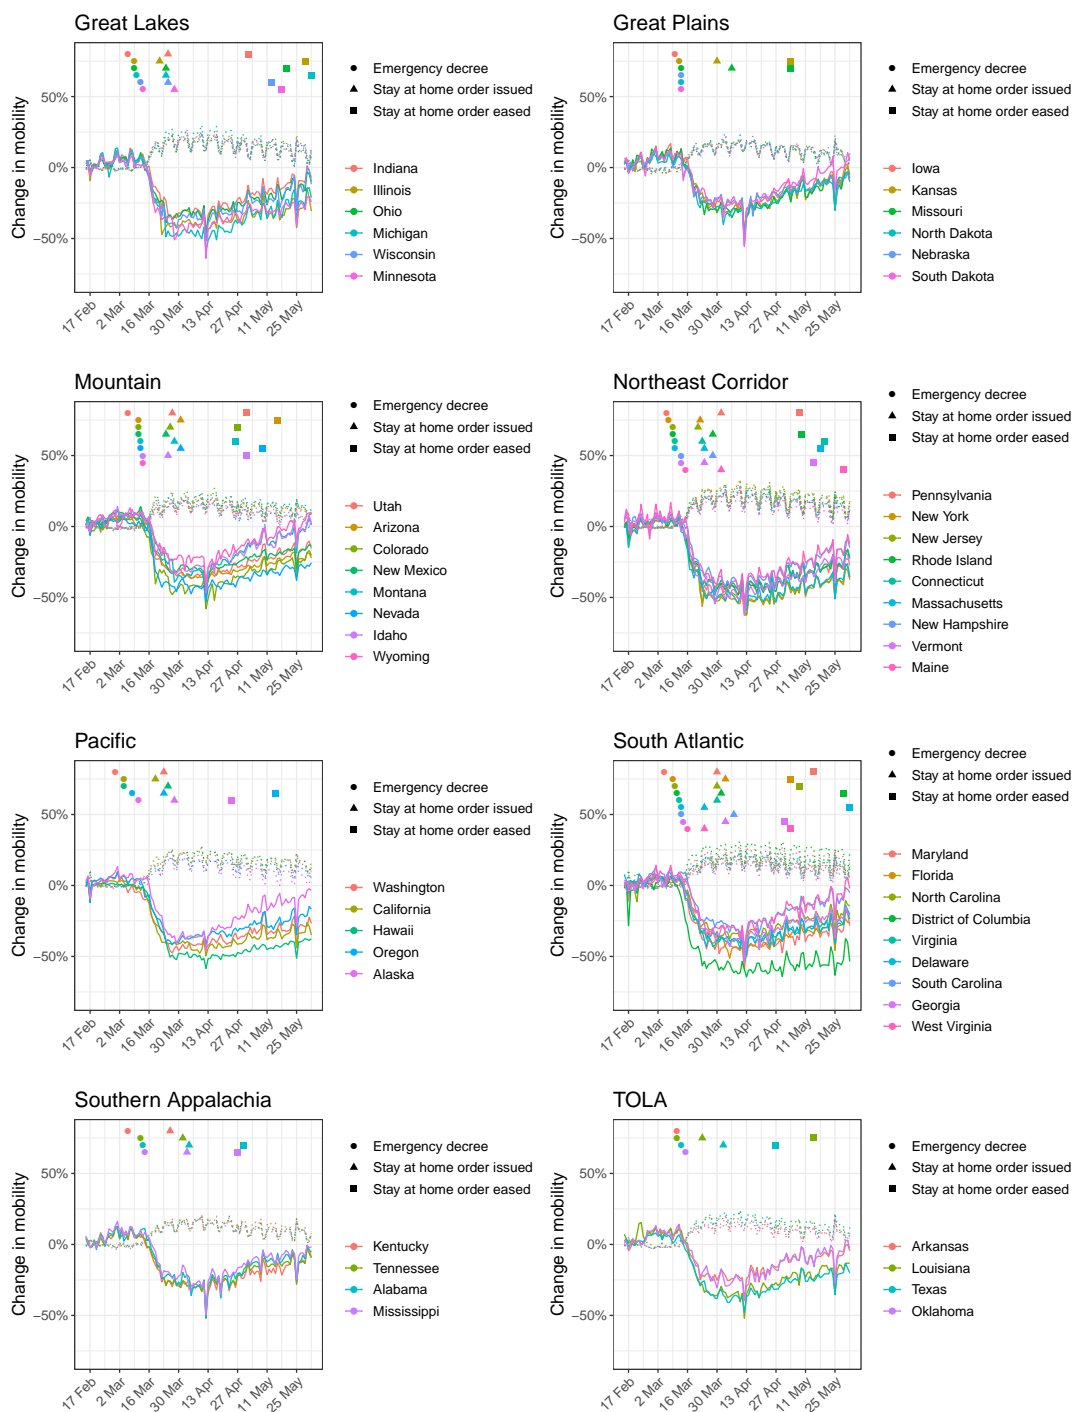

Figure 12: Comparison of mobility data from Google with government interventions for the 50 states and the District of Columbia. The solid lines show average mobility (across categories “retail & recreation”, “grocery & pharmacy”, “workplaces”) and the dotted lines show “residential”. Intervention dates are indicated by shapes as shown in the legend; see Section 4 for more information about the interventions implemented. There is a strong correlation between the onset of interventions and reductions in mobility.

## G Mobility regression analysis

In Figure 13 we regressed NPIs against average mobility. We parameterised NPIs as piece-wise constant functions that are zero when the intervention has not been implemented and one when it has. We evaluated the correlation between the predictions from the linear model and the actual average mobility. We also lagged the timing of interventions and investigate its impact on predicted correlation. We observed reduced correlation when lagging (forward and backwards) the timing of NPIs, which suggested an immediate impact on mobility.

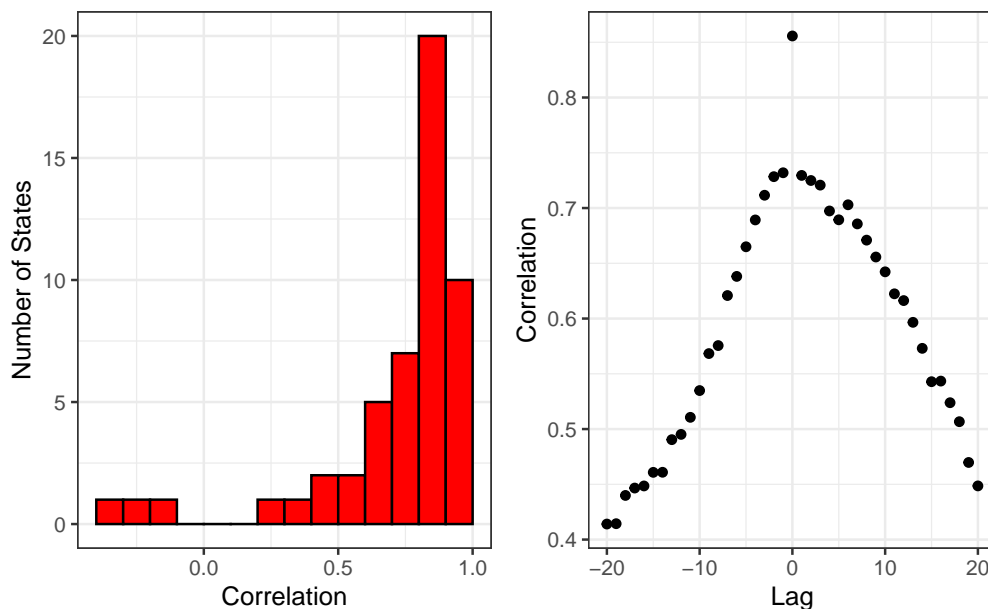

Figure 13: Mobility regression analysis.

## H Comparison of model attack rates with and without interventions in the model

We show in Figure 14 that there is little difference between the attack rates for two models where we include the "Stay at Home" intervention in our model as well and when we just use mobility. We, therefore, choose the mobility only model to limit the numbers of parameters we are fitting.

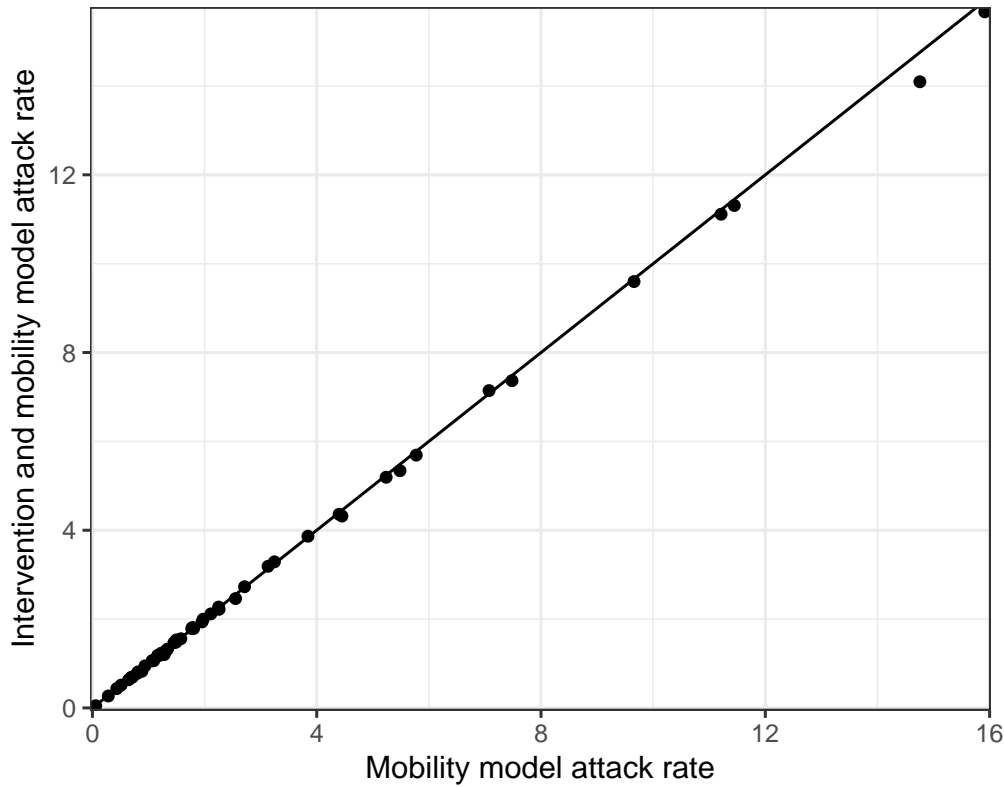

Figure 14: Mobility regression analysis.

## I State-specific weekly effects

Our model includes a state-specific weekly effect  $\epsilon_{w,m}$  (see equations 12, 14) for each week  $w$  in the epidemic period for a state. As described in Section 5, We assign an autoregressive process with mean 0 as prior to this effect. Figure 15 shows the posterior of this effect on the same scale as in Figure 6, that is, the percent reduction in  $R_t$  with mobility variables held constant<sup>4</sup>. Values above 0 have the interpretation that the state-specific weekly effect lowers the reproduction number  $R_{t,m}$ , i.e. transmission for week  $t$  and state  $m$  is lower than what is explained by the mobility covariates.

<sup>4</sup>Draws from the posterior are transformed with  $1 - f(-\epsilon_{m,w_m(t)})$ , where  $f(x) = 2 \exp(x)/(1 + \exp(x))$  is twice the inverse logit function.

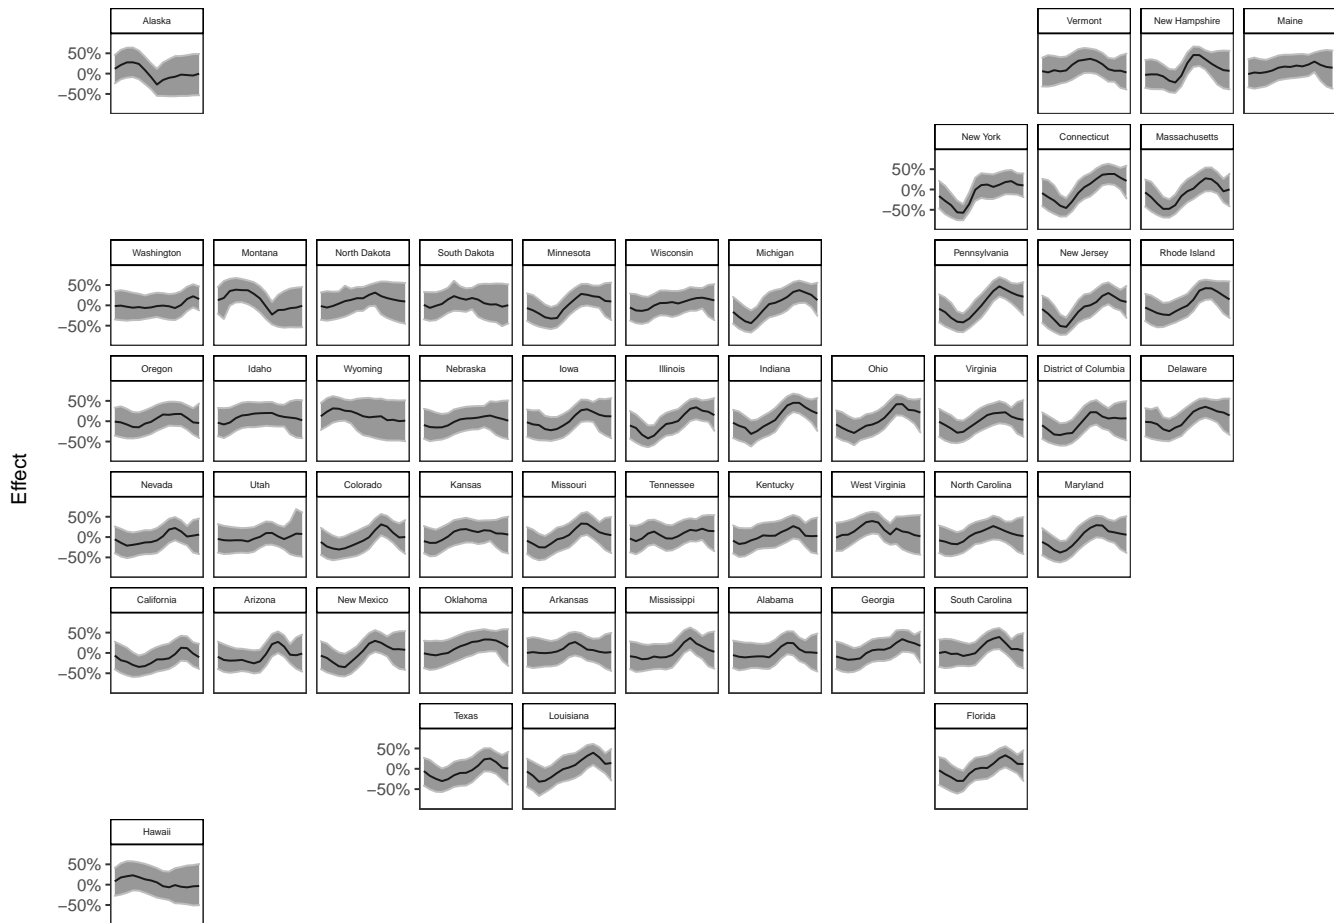

Figure 15: Percent reduction in  $R_t$  due to the weekly, state-level autoregressive effect.

## J Sensitivity analysis to infection fatality ratio

Geographic-specific contact surveys are important for calculating the weighted IFR values according to the methods in [19, 20]. There is no large-scale cross-generational contact survey, similar to the polymod survey [11], implemented in the USA. Therefore, it was important to understand if the model was robust to changes in the underlying contact survey. We calculated the IFRs using three different contact matrices: UK, France and Netherlands. We believe that the USA is culturally closest to that UK out of those countries we had contact matrices for, but also considered France where we saw the greatest mixing of the elderly and the Netherlands which showed the *average* behaviour of the European studies used in [20]. We found that the IFR, calculated for each state using the three contact matrices, lay within the posterior of IFR in our model (Figure 16). We also noted that our results remained approximately constant when using the IFR calculated from the three different contact matrices as the mean of the prior IFR in our model, see Section 5.

Since we are using the same contact matrix across all the states, the differences in IFR are due to the population demographics and not due to differential contacts. The low IFR in Texas and Utah reflects the younger population there whereas the higher IFR in Florida and Maine is due to the older population. This is a limitation of our methods.

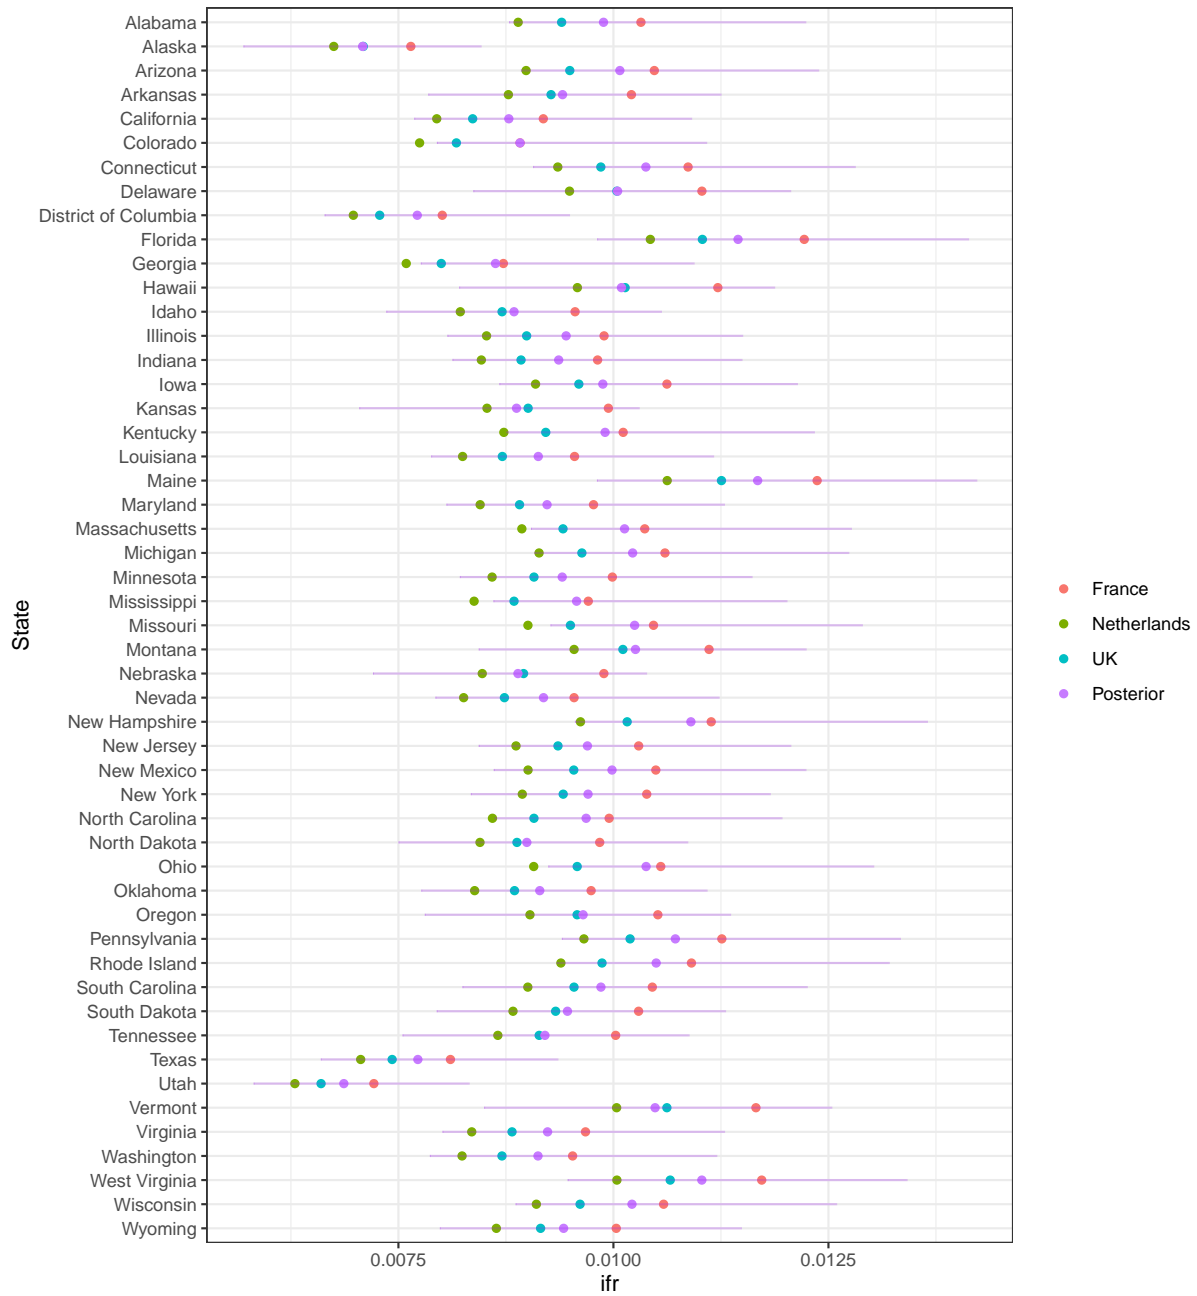

Figure 16: Sensitivity analysis for IFR. The red, green and blue dots show the IFR values calculated according to [19, 20] using the French, Dutch and UK contact matrices respectively. The purple dot shows the mean of our posterior estimates for the IFR run using the UK contact matrix estimate and the purple error shows the 95% credible intervals of the distribution.
